# Supplementary material
Source: Research Square preprint supplement (doi:10.21203/rs.3.rs-9295361/v1)

# Estudo sobre a perceção de diferentes problemas da humanidade

No âmbito do Mestrado em Food Design da Escola Superior de Hotelaria e Turismo do Estoril, estou a desenvolver um projeto de conceção de uma experiência gastronómica - O Grito no Prato, e para a qual gostaria de saber a sua opinião sobre alguns dos problemas da humanidade.

O preenchimento do inquérito não demora mais de 5 min. Obrigado pela colaboração.

Os dados são recolhidos em conformidade com o Regulamento Geral sobre a Proteção de Dados (RGPD) da União Europeia. Não está incluída qualquer informação que permita a identificação pessoal.

josesimoes@esad.pt [Switch account](#)

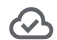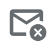

Not shared

\* Indicates required question

1. Idade \*

Your answer

2. Género \*

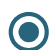

Feminino

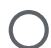

Masculino

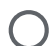

Indefinido

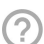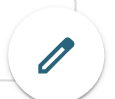

### 3. Grau de Instrução Acadêmica \*

- Inferior ou igual ao 4º ano
- Ensino do 1º, 2º e 3º Ciclo
- Ensino Secundário
- Ensino Universitário

### 4. Profissão \*

Your answer

### 5. Concelho de Residência \*

Your answer

6. Quanto lhe preocupa os problemas da humanidade e do planeta (ex. fome, pobreza, guerra, alimentação, poluição, alterações climáticas, obesidade, violência, segurança e pandemias)? \*

Muito      1      2      3      4      5      Pouco ou Nada

                      

7. Com que frequência pensa na fome? \*

Muito      1      2      3      4      5      Pouco ou Nada

                      

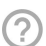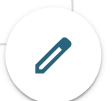

8. Com que frequência pensa na pobreza? \*

|       |                       |                       |                       |                       |                       |               |
|-------|-----------------------|-----------------------|-----------------------|-----------------------|-----------------------|---------------|
|       | 1                     | 2                     | 3                     | 4                     | 5                     |               |
| Muito | <input type="radio"/> | Pouco ou Nada |

9. Com que frequência pensa na guerra? \*

|       |                       |                       |                       |                       |                       |               |
|-------|-----------------------|-----------------------|-----------------------|-----------------------|-----------------------|---------------|
|       | 1                     | 2                     | 3                     | 4                     | 5                     |               |
| Muito | <input type="radio"/> | Pouco ou Nada |

10. Com que frequência pensa no futuro da alimentação? \*

|       |                       |                       |                       |                       |                       |               |
|-------|-----------------------|-----------------------|-----------------------|-----------------------|-----------------------|---------------|
|       | 1                     | 2                     | 3                     | 4                     | 5                     |               |
| Muito | <input type="radio"/> | Pouco ou Nada |

11. Com que frequência pensa na poluição? \*

|       |                       |                       |                       |                       |                       |               |
|-------|-----------------------|-----------------------|-----------------------|-----------------------|-----------------------|---------------|
|       | 1                     | 2                     | 3                     | 4                     | 5                     |               |
| Muito | <input type="radio"/> | Pouco ou Nada |

12. Com que frequência pensa nas alterações climáticas? \*

|       |                       |                       |                       |                       |                       |               |
|-------|-----------------------|-----------------------|-----------------------|-----------------------|-----------------------|---------------|
|       | 1                     | 2                     | 3                     | 4                     | 5                     |               |
| Muito | <input type="radio"/> | Pouco ou Nada |

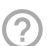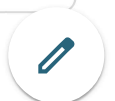

13. Com que frequência pensa na obesidade (principalmente a infantil)? \*

|       |                       |                       |                       |                       |                       |               |
|-------|-----------------------|-----------------------|-----------------------|-----------------------|-----------------------|---------------|
|       | 1                     | 2                     | 3                     | 4                     | 5                     |               |
| Muito | <input type="radio"/> | Pouco ou Nada |

14. Com que frequência pensa na violência? \*

|       |                       |                       |                       |                       |                       |               |
|-------|-----------------------|-----------------------|-----------------------|-----------------------|-----------------------|---------------|
|       | 1                     | 2                     | 3                     | 4                     | 5                     |               |
| Muito | <input type="radio"/> | Pouco ou Nada |

15. Com que frequência pensa na segurança (incluindo a digital)? \*

|       |                       |                       |                       |                       |                       |               |
|-------|-----------------------|-----------------------|-----------------------|-----------------------|-----------------------|---------------|
|       | 1                     | 2                     | 3                     | 4                     | 5                     |               |
| Muito | <input type="radio"/> | Pouco ou Nada |

16. Com que frequência pensa em pandemias? \*

|       |                       |                       |                       |                       |                       |               |
|-------|-----------------------|-----------------------|-----------------------|-----------------------|-----------------------|---------------|
|       | 1                     | 2                     | 3                     | 4                     | 5                     |               |
| Muito | <input type="radio"/> | Pouco ou Nada |

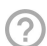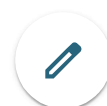

17. Coloque por ordem de importância os seguintes problemas (deve colocar de 1 - maior a 10 - menor, não repetindo números nos diferentes problemas. Caso não veja todas as respostas, deslize o cursor na parte inferior da questão para a direita).

Fome

|                       | 1                     | 2                     | 3                     | 4                     | 5                     | 6                     | 7                     | 8                     | 9                     |
|-----------------------|-----------------------|-----------------------|-----------------------|-----------------------|-----------------------|-----------------------|-----------------------|-----------------------|-----------------------|
| Fome                  | <input type="radio"/> |
| Pobreza               | <input type="radio"/> |
| Guerra                | <input type="radio"/> |
| Futuro da Alimentação | <input type="radio"/> |
| Poluição              | <input type="radio"/> |
| Alterações climáticas | <input type="radio"/> |
| Obesidade             | <input type="radio"/> |
| Violência             | <input type="radio"/> |
| Segurança             | <input type="radio"/> |
| Pandemia              | <input type="radio"/> |

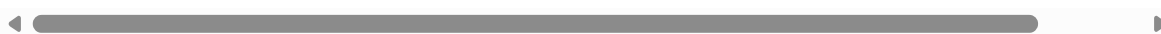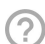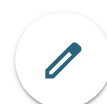

18. Escolha uma das 5 palavras que, segundo a sua opinião, melhor descreve a seguinte imagem sobre a fome. \*

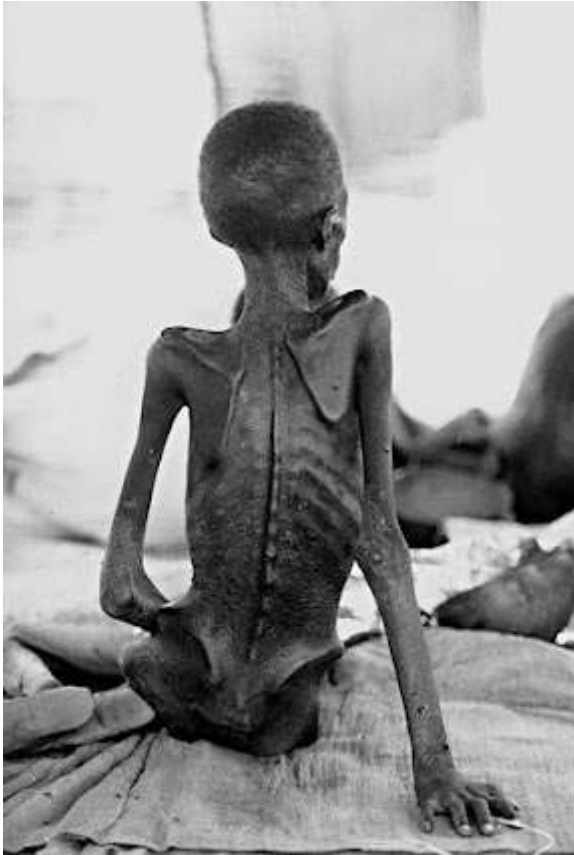

- injusto
- chocante
- impactante
- angustiante
- desumano

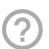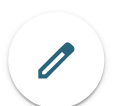

19. Escolha uma das 5 palavras que, segundo a sua opinião, melhor descreve a seguinte imagem sobre a pobreza. \*

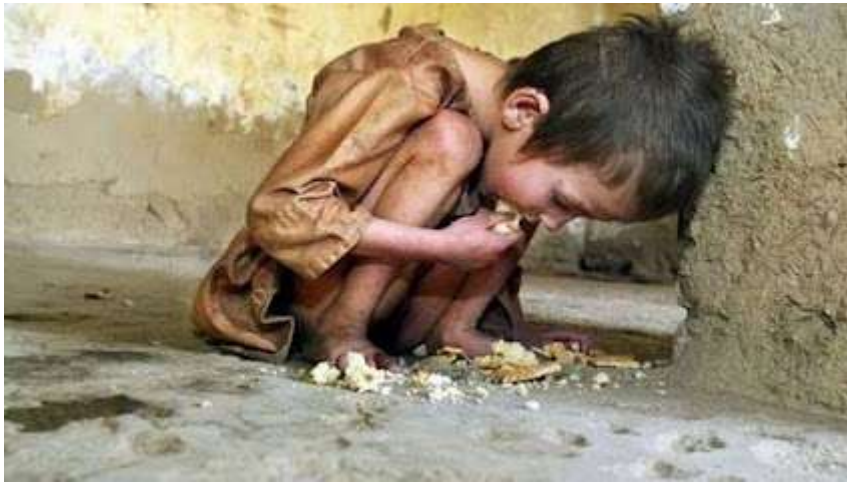

- injusto
- chocante
- impactante
- traumatizante
- incompreensível

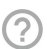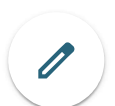

20. Escolha uma das 5 palavras que, segundo a sua opinião, melhor descreve a seguinte imagem sobre a guerra. \*

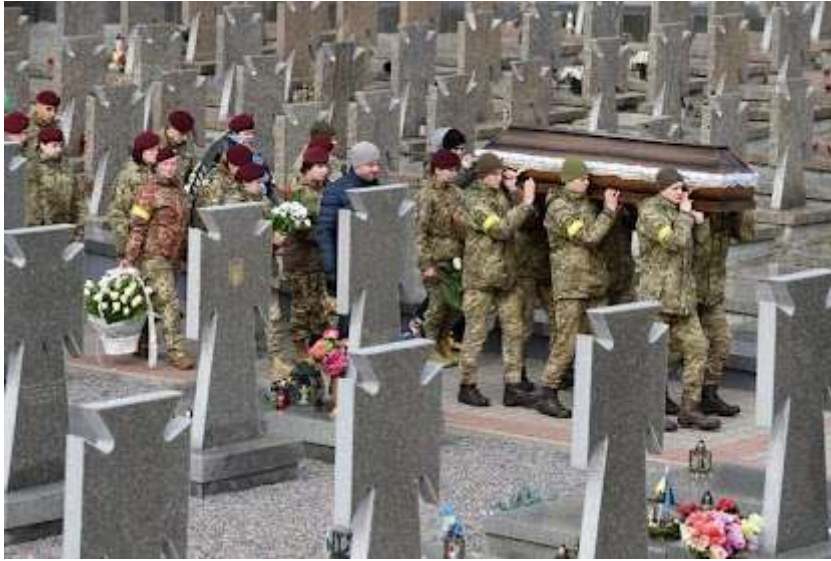

- incompreensível
- dor
- perda
- traumatizante
- evitável



21. Escolha uma das 5 palavras que, segundo a sua opinião, melhor descreve a seguinte imagem sobre o futuro da alimentação. \*

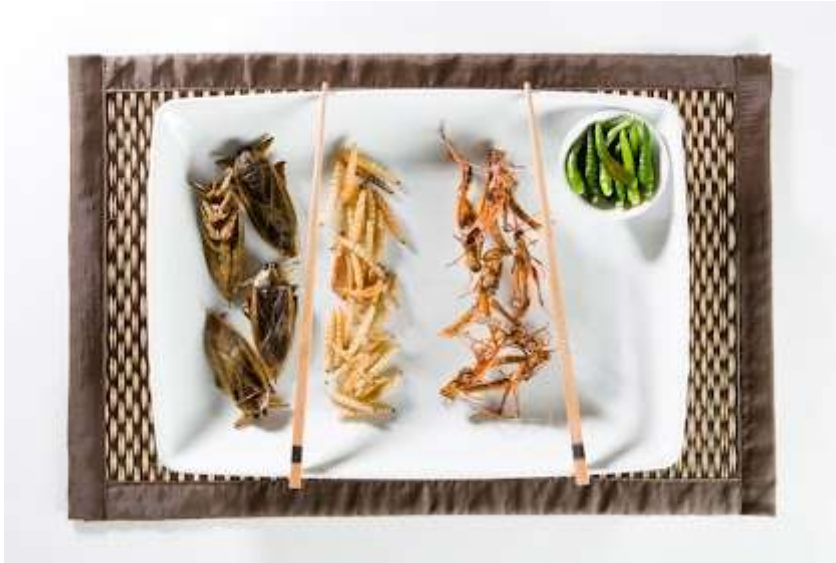

- repugnante
- interessante
- comestível
- inevitável
- nutritivo



22. Escolha uma das 5 palavras que, segundo a sua opinião, melhor descreve a seguinte imagem sobre a poluição. \*

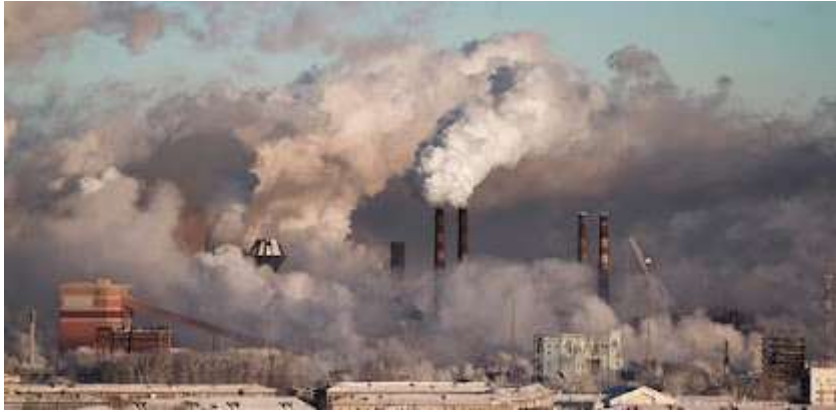

- preocupante
- irresponsável
- incompreensível
- monóxido de carbono
- ozono

23. Escolha uma das 5 palavras que, segundo a sua opinião, melhor descreve a seguinte imagem sobre alterações climáticas. \*

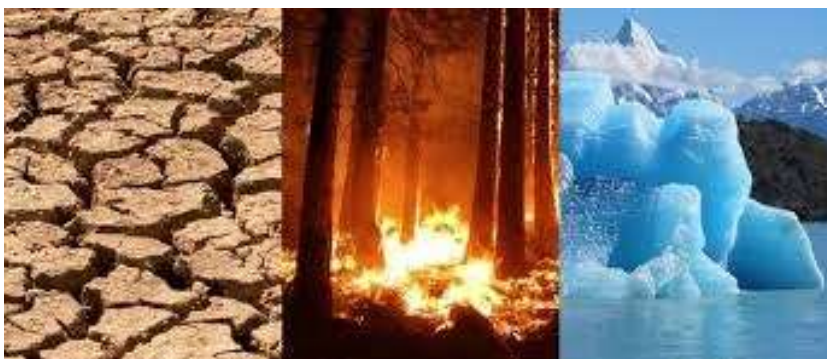

- preocupante
- compromete
- desgoverno
- incompreensível
- futuro

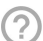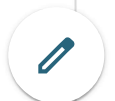

24. Escolha uma das 5 palavras que, segundo a sua opinião, melhor descreve a seguinte imagem sobre a obesidade. \*

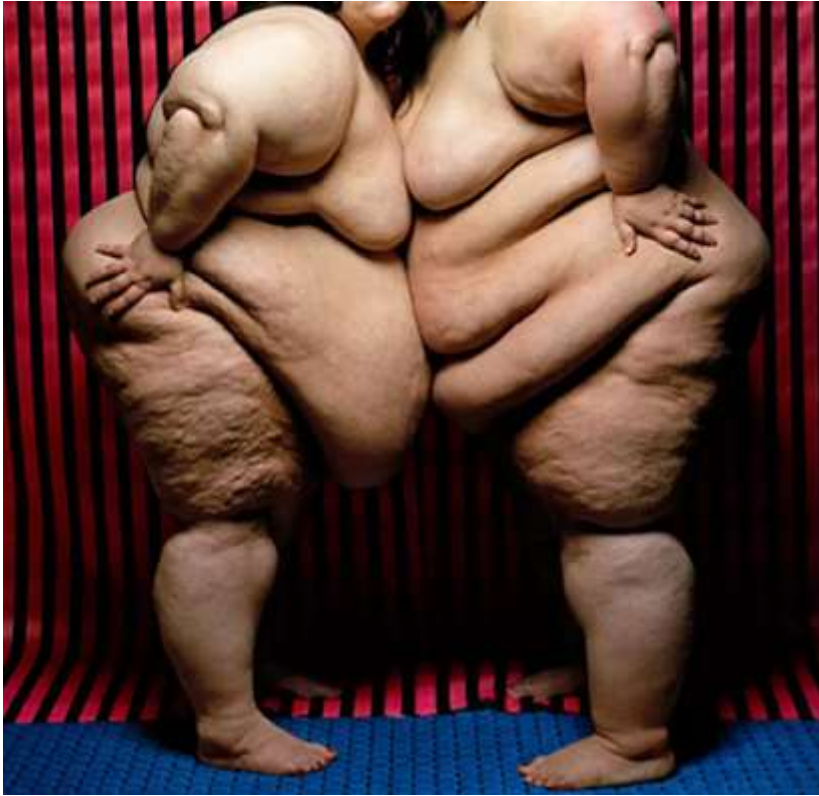

- excesso
- descontrolo
- incompreensível
- hipertensão
- preocupante

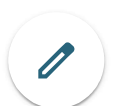

25. Escolha uma das 5 palavras que, segundo a sua opinião, melhor descreve a seguinte imagem sobre a violência. \*

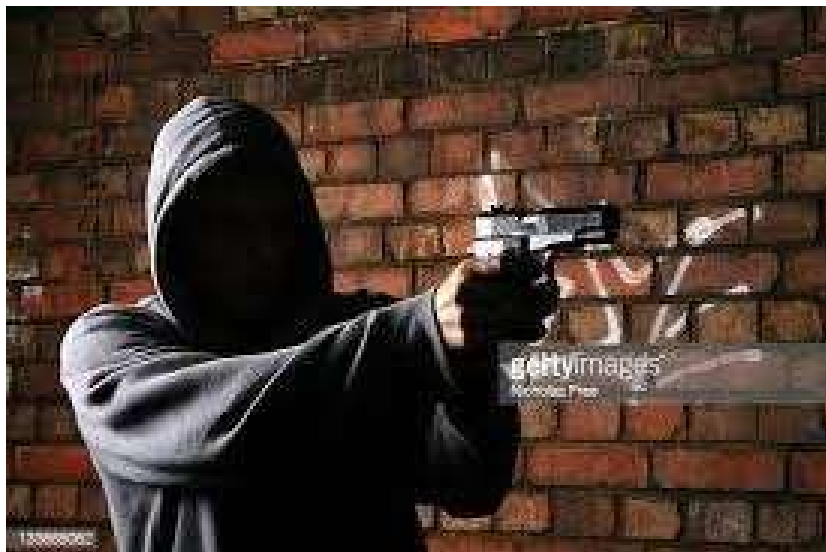

- brutalidade
- terror
- assalto
- crueldade
- desordem



26. Escolha uma das 5 palavras que, segundo a sua opinião, melhor descreve a seguinte imagem sobre a segurança. \*

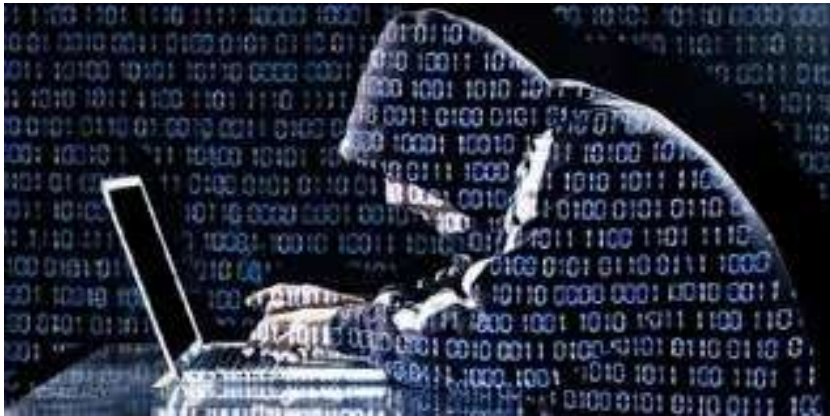

- preocupante
- privacidade
- confidencialidade
- autenticidade
- integridade

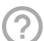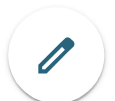

27. Escolha uma das 5 palavras que, segundo a sua opinião, melhor descreve a seguinte imagem sobre a pandemia. \*

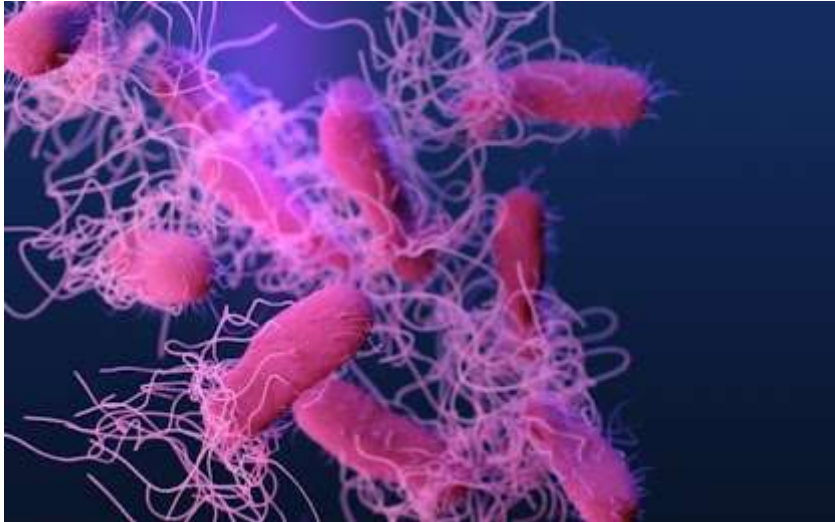

- epidemia
- contágio
- inquietante
- doença
- virus

28. Que importância pode ter o Food Design, no âmbito das suas diferentes dimensões de intervenção, na consciencialização das pessoas para os problemas da humanidade e, em particular, para a fome? \*

|       |                       |                       |                       |                       |                       |               |
|-------|-----------------------|-----------------------|-----------------------|-----------------------|-----------------------|---------------|
|       | 1                     | 2                     | 3                     | 4                     | 5                     |               |
| Muito | <input type="radio"/> | Pouco ou Nada |



29. Gostaria de participar numa experiência gastronómica cujo conceito fosse em torno de alguns problemas da humanidade referidos neste inquérito? \*

- Sim
- Não
- Talvez

30. Estaria recetivo a participar numa experiência gastronómica cuja receita fosse doada à instituição Acreditar - Associação de Pais e Amigos de Crianças com Cancro? \*

- Sim
- Não
- Talvez

31. Seria interessante desafiar chefs de produção alimentar (inclusivamente Michelin) para interpretarem num prato um dos problemas da humanidade atrás referidos para um projeto editorial (conceção de um livro) cuja receita fosse doada a uma instituição como, por exemplo, o Instituto Português de Oncologia? \*

- Sim
- Não
- Talvez

32. Caso tenha interesse em ter acesso ao resultado do inquérito, indique o seu e-mail.

Your answer

Submit

Clear f

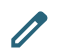

Never submit passwords through Google Forms.

This form was created inside of esad – arte&design. - [Contact form owner](#)

Does this form look suspicious? [Report](#)

# Google Forms

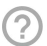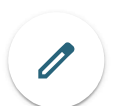

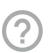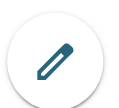

Supplement: Supplementary file 2 [file aebf8f47bc5da4da32bc19c6.pdf]
