# Supplementary material
Source: Research Square preprint supplement (doi:10.21203/rs.3.rs-9295361/v1)
Supplement: Supplementary file 1 [file 7843889b4a4bb7c371b5ac59.docx]

**Appendix A – Data collection protocol.**

# 1. Study Design

This study adopts a cross-sectional survey design aimed at collecting quantitative and qualitative data regarding perceptions of global issues within the context of the project 'O Grito no Prato' (*Scream on the plate*).

# 2. Participants

Participants were recruited through convenience sampling. The sample includes individuals of diverse ages, genders, educational backgrounds, and professional fields.

# 3. Data Collection Instrument

Data were collected by means of a structured questionnaire composed of closed-ended Likert-scale questions, ranking tasks, and open-ended questions to capture emotional and conceptual responses.

# 4. Procedure

The questionnaire was distributed online. Participation was voluntary, and respondents were informed about the purpose of the study before completing the survey. The average completion time was approximately 5 minutes.

# 5. Ethical Considerations

All data were collected in accordance with the General Data Protection Regulation (GDPR). No personally identifiable information was required, except for optional email addresses, which were excluded from analytical datasets.

# 6. Data handling

Responses were anonymised prior to analysis. Data cleaning procedures included handling missing values, standardising variable names, and preparing the dataset for statistical analysis.

# 7. Data analysis

Collected data were analysed using SPSS software. Analyses included descriptive statistics, frequency distributions, and exploratory comparisons between variables.

# 8. Supplementary materials

The full questionnaire, codebook, and statistical analysis documentation are provided in the supplementary materials associated with this study.

# **Appendix B – Codebook: Study on the perception of global issues survey**

**Sample size (N):** 219 respondents
**Data type:** Cross-sectional survey

## ***Section 1: Sociodemographic variables***

**Q1 – Age**Type: Scale (numeric, years)

**Q2 – Gender**Type: Nominal
Values: Male; Female; Non defined

**Q3 – Educational background**Type: Ordinal
Values: Ensino Secundário; Ensino Universitário; Outros

**Q4 – Profession**Type: String (open-ended)

**Q5 – Municipality of residence**Type: String (open-ended)

## ***Section 2: Perception and awareness of global issues***

**Q6 – overall concern about global challenges**

**Q7–Q16 – Frequency of thinking about specific issues:**

Hunger

Poverty

War

Future of Food

Pollution

Climate Change

Obesity (especially in children)

Violence

Security (including digital security)

Pandemics

Type: Ordinal (Likert scale)

Scale:
1 = Very low / Never
2 = Low / Rarely
3 = Moderate / Sometimes
4 = High / Often
5 = Very high / Very often

## ***Section 3: Ranking of global issues***

**Q17 – Ranking of issues**Type: Ordinal (ranking)

Participants ranked the following issues from:
**1 = Most important → 10 = Least important**

Hunger

Poverty

War

Future of Food

Pollution

Climate Change

Obesity (especially in children)

Violence

Security (including digital security)

Pandemics

## ***Section 4: Image-Based word association***

**Q18–Q27 – Descriptive word selection**Type: Nominal (categorical)

Participants selected one word (from five predefined options) to describe images related to:

| Variable | Topic |
| --- | --- |
| Q18 | Hunger |
| Q19 | Poverty |
| Q20 | War |
| Q21 | Future of food |
| Q22 | Pollution |
| Q23 | Climate change |
| Q24 | Obesity |
| Q25 | Violence |
| Q26 | Security |
| Q27 | Pandemics |

Note: Response categories vary per item (context-specific descriptors such as “unfair”, “traumatizing”, “repugnant”, “terror”, etc.).

## ***Section 5: Food Design and behavioural intentions***

**Q28 – Role of Food Design**Type: String (open-ended)
Description: Perceived role of Food Design in raising awareness of global challenges

**Q29 – Willingness to Participate in Experience**Type: Nominal
Values: Yes; No; Maybe

**Q30 – Willingness to Participate with Charitable Component**Type: Nominal
Values: Yes; No; Maybe

**Q31 – Interest in chef-based editorial project**Type: Nominal
Values: Yes; No; Maybe

**Q32 – Email address**Type: String (optional)

Participants could voluntarily provide their email address **to receive information about the results of the study**.

**Appendix C – Questions on the perception of various global challenges (self-developed)**

As part of the Master’s degree in Food Design at the Estoril Higher Institute for Tourism and Hotel Studies, I am developing a project to design a gastronomic experience - *The Scream on the Plate* - for which I would like to know your opinion on some of humanity’s issues.

The questionnaire takes no more than 5 minutes to complete. Thank you for your collaboration.

The data are collected in accordance with the European Union’s General Data Protection Regulation (GDPR). No personally identifiable information is included.

Translation of the Portuguese version.

*Section 1*

1. Age

2. Gender

3. Educational Background

4. Profession

5. Municipality of Residence

*Section 2*

6. How concerned are you about the major challenges facing humanity and the planet (e.g., hunger, poverty, war, food security, pollution, climate change, obesity, violence, security, and pandemics)?

7. How often do you think about hunger?

8. How often do you think about poverty?

9. How often do you think about war?

10. How often do you think about the future of food?

11. How often do you think about pollution?

12. How often do you think about climate change?

13. How often do you think about obesity (especially in children)?

14. How often do you think about violence?

15. How often do you think about security (including digital security)?

16. How often do you think about pandemics?

*Section 3*

17. Please rank the following issues in order of importance (1 = most important, 10 = least important, do not repeat numbers): Hunger; Poverty; War; Future Food; Pollution; Climate Change; Obesity; Violence; Security; Pandemic

*Section 4*

18. Choose one of the following five words that best describes the image related to hunger (unfair; shocking; impactful; distressing; non-human).

19. Choose one of the following five words that best describes the image related to poverty (unfair; shocking; impactful; traumatizing; incomprehensible).

20. Choose one of the following five words that best describes the image related to war (incomprehensible; pain; loss; traumatizing; avoidable).

21. Choose one of the following five words that best describes the image related to the future food (repugnant; interesting; edible; avoidable; nutritious).

22. Choose one of the following five words that best describes the image related to pollution (worrying; irresponsible; incomprehensible; carbon monoxide; ozone).

23. Choose one of the following five words that best describes the image related to climate change (worrying; jeopardize; misgovernment; incomprehensible; future).

24. Choose one of the following five words that best describes the image related to obesity (excess; loss of control; incomprehensible; hypertension; worrying).

25. Choose one of the following five words that best describes the image related to violence (brutality; terror; assault; cruelty; disorder).

26. Choose one of the following five words that best describes the image related to security (worrying; privacy; confidentiality; use of data; integrity).

27. Choose one of the following five words that best describes the image related to pandemics (epidemic; infection; illness; worrying; virus).

*Section 5*

28. What role do you think Food Design can play, in its various dimensions, in raising awareness about the challenges facing humanity, and in particular, hunger?

29. Would you like to participate in a gastronomic experience based on some of the global challenges mentioned in this survey?

30. Would you be willing to participate in a gastronomic experience where the recipe is donated to the organization “Acreditar – Associação de Pais e Amigos de Crianças com Cancro”?

31. Would it be interesting to challenge chefs (including Michelin-starred chefs) to interpret one of the global challenges mentioned above in a dish for an editorial project (e.g., a book), with the recipe being donated to an institution such as the Portuguese Oncology Institute?

32. If you would like to receive the survey results, please provide your email address.
