# Supplementary material
Source: Research Square preprint supplement (doi:10.21203/rs.3.rs-9295361/v1)
Supplement: Supplementary file 2 [file c32681a20364d5280d66a496.xlsx]

## Sheet: Data
	Question 1	Question 2	Question 3	Question 4	Question 5	Question 6	Question 7	Question 8	Question 9	Question 10	Question 11	Question 12	Question 13	Question 14	Question 15	Question 16	Question 17										Question 18	Question 19	Question 20	Question 21	Question 22	Question 23	Question 24	Question 25	Question 26	Question 27	Question 28	Question 29	Question 30	Question 31	Question 32
1	25	Male	Higher Education	Medical Doctor	Porto	2	3	3	2	3	2	2	2	3	4	2	1	2	5	8	3	4	6	9	10	7	distressing	traumatizing	traumatizing	repugnant	irresponsible	worrying	loss of control	terror	confidentiality	illness	3	Yes	Yes	Yes
2	36	Female	Higher Education	Graphic Designer	Lisboa	3	3	2	2	2	2	3	4	2	2	2	8	5	7	10	6	9	1	4	3	2	non-human	impactful	pain	repugnant	worrying	future	excessive	cruelty	confidentiality	illness	2	Yes	Yes	Yes
3	61	Male	Higher Education	Director	Albergaria-a-Velha	1	3	3	1	4	4	4	4	4	4	2	1	3	2	7	6	5	8	9	10	4	non-human	unfair	incomprehensible	edible	irresponsible	jeopardize	loss of control	terror	confidentiality	infection	1	Yes	Yes	Yes
4	22	Male	Secondary Education	Student	Albergaria-a-Velha	1	1	1	1	1	1	1	5	1	2	1	6	5	9	8	7	4	6	8	9	10	non-human	traumatizing	loss	unavoidable	worrying	worrying	excessive	assault	authenticity	infection	1	Yes	Yes	Yes
5	49	Female	Higher Education	Lecturer	Ílhavo	1	3	3	1	3	1	1	3	3	4	4	3	2	1	9	6	7	8	4	5	10	distressing	incomprehensible	avoidable	nutritious	irresponsible	future	worrying	disorder	privacy	illness	1	Maybe	Yes	Yes
6	22	Female	Higher Education	Student	Valongo	1	4	3	3	3	4	1	4	4	3	3	5	2	8	9	4	1	10	7	3	6	non-human	unfair	pain	repugnant	worrying	worrying	loss of control	cruelty	worrying	disturbing	3	Yes	Yes	Yes
7	64	Male	Higher Education	Lecturer	Matosinhos	1	3	2	2	3	2	2	1	2	1	3	1	1	2	2	2	1	1	2	1	2	non-human	incomprehensible	avoidable	unavoidable	irresponsible	worrying	incomprehensive	brutality	privacy	disturbing	1	Maybe	Maybe	Yes
8	43	Male	Higher Education	Teacher	Matosinhos	3	3	2	2	3	2	2	3	3	2	2	3	3	2	3	2	2	3	2	2	2	distressing	incomprehensible	avoidable	unavoidable	irresponsible	incomprehensible	loss of control	cruelty	worrying	illness	3	Yes	Yes	Yes
9	59	Male	Higher Education	Teacher	Porto	2	3	2	1	2	2	3	4	2	3	5	3	2	1	6	5	4	7	8	9	10	non-human	incomprehensible	incomprehensible	interesting	worrying	misgovernment	excessive	disorder	privacy	disturbing	2	No	No	Yes
10	33	Female	Higher Education	Designer	v N Gaia	2	2	2	3	3	3	4	2	2	2	4	2	1	4	7	6	10	8	3	5	9	distressing	incomprehensible	loss	repugnant	worrying	future	loss of control	disorder	privacy	illness	2	Yes	Yes	Yes
11	41	Male	Higher Education	Medical Doctor	Coimbra	1	4	2	2	1	1	1	1	2	3	4	6	7	3	4	2	1	8	9	5	10	unfair	impactful	avoidable	repugnant	irresponsible	worrying	loss of control	disorder	worrying	disturbing	1	Yes	Yes	Yes
12	56	Male	Higher Education	Teacher	Oliveira de Azeméis	4	4	5	3	4	3	5	2	4	4	4	1	2	7	9	4	8	1	6	5	3	non-human	unfair	incomprehensible	unavoidable	irresponsible	misgovernment	loss of control	terror	worrying	disturbing	2	Maybe	Yes	Yes
13	60	Male	Higher Education	Businessman	Porto	4	4	4	4	3	3	3	3	3	4	3	10	9	7	8	6	5	2	3	4	1	non-human	incomprehensible	avoidable	edible	irresponsible	worrying	excessive	disorder	worrying	virus	4	No	Yes	Yes
14	64	Male	Higher Education	Lecturer	Lisboa	1	2	1	1	2	2	1	3	2	1	2	5	3	1	9	4	2	10	7	6	8	non-human	unfair	pain	interesting	worrying	future	worrying	disorder	privacy	disturbing	2	No	No	Yes
15	38	Male	Higher Education	Engineer	Porto	2	4	2	3	2	1	2	5	4	2	4	5	1	6	9	3	4	7	8	2	10	non-human	unfair	avoidable	nutritious	worrying	worrying	worrying	disorder	integrity	virus	2	Yes	Yes	Yes
16	31	Female	Higher Education	Senior Technical Staff	Santarém	4	3	3	4	5	4	4	4	5	5	3	8	8	8	10	7	7	9	9	10	5	distressing	incomprehensible	avoidable	interesting	irresponsible	worrying	loss of control	terror	privacy	disturbing	1	Yes	Yes	Maybe
17	55	Female	Higher Education	Administrative Coordinator	Gondomar	1	1	1	3	2	2	1	1	1	1	3	1	2	6	10	7	8	4	3	5	9	non-human	shocking	pain	edible	worrying	future	loss of control	assault	worrying	virus	2	Yes	Yes	Yes
18	48	Male	Higher Education	Engineer	Porto	4	4	2	2	2	2	2	2	2	2	3	1	2	3	7	6	9	8	4	5	10	non-human	unfair	avoidable	edible	worrying	future	loss of control	disorder	privacy	illness	2	Yes	Yes	Yes
19	53	Female	Higher Education	Treasury Coordination	Gondomar	1	1	1	1	1	1	1	1	1	1	1	1	2	3	9	6	4	5	8	7	10	non-human	shocking	pain	repugnant	worrying	future	loss of control	cruelty	worrying	virus	2	Maybe	Yes	Yes
20	53	Female	Secondary Education	Administrative	Matosinhos	1	1	1	2	2	2	2	2	2	2	4	9	9	7	7	7	7	7	9	7	7	shocking	traumatizing	avoidable	interesting	worrying	worrying	loss of control	disorder	privacy	disturbing	4	No	No	No
21	47	Male	Higher Education	Engineer	Ilhavo	4	4	3	3	5	5	3	4	4	4	3	6	5	4	7	8	3	2	4	5	3	shocking	shocking	avoidable	repugnant	irresponsible	misgovernment	excessive	brutality	worrying	epidemic	4	Maybe	Maybe	Yes
22	52	Female	Higher Education	Social Assistant	Ovar	1	1	1	2	2	3	3	3	2	2	3	1	2	3	6	5	5	7	4	8	9	non-human	incomprehensible	avoidable	repugnant	irresponsible	misgovernment	excessive	terror	privacy	disturbing	2	Yes	Yes	Yes
23	52	Male	Higher Education	Lecturer	Aveiro	1	5	3	4	4	3	2	3	4	2	5	10	5	9	4	6	8	3	1	7	2	non-human	unfair	incomprehensible	interesting	worrying	worrying	excessive	terror	worrying	disturbing	4	Maybe	Yes	Yes
24	48	Female	Higher Education	Teacher	Viseu	1	1	1	1	1	1	1	1	1	1	2	9	10	8	2	6	4	3	7	5	1	distressing	incomprehensible	avoidable	repugnant	irresponsible	worrying	excessive	terror	worrying	illness	3	Maybe	Yes	Yes
25	58	Male	Higher Education	Lecturer	Lisboa	1	2	2	3	2	3	3	3	4	3	5	1	2	8	4	5	3	7	9	6	10	unfair	unfair	avoidable	repugnant	worrying	worrying	incomprehensive	disorder	worrying	illness	3	No	No	No
26	50	Female	Higher Education	Advertising Specialist	Porto	1	1	1	1	1	2	2	2	1	1	1	10	10	10	10	9	9	9	10	10	10	non-human	incomprehensible	incomprehensible	interesting	worrying	worrying	worrying	brutality	privacy	disturbing	2	Maybe	Yes	Yes
27	53	Male	Higher Education	Lecturer	Santo Tirso	1	3	2	2	4	3	3	4	3	3	3	8	10	10	6	9	8	6	8	8	6	distressing	incomprehensible	incomprehensible	edible	incomprehensive	worrying	excessive	brutality	worrying	virus	3	Maybe	Maybe	Yes
28	57	Female	Secondary Education	Comercial Assistant	Porto	2	3	2	2	3	2	4	1	2	2	3	1	2	3	6	4	7	8	5	9	10	non-human	unfair	avoidable	unavoidable	incomprehensive	future	loss of control	terror	worrying	illness	2	Yes	Yes	Yes
29	50	Female	Higher Education	Senior Communications Officer	Cascais	1	2	2	1	2	2	2	3	1	2	2	2	2	1	3	2	2	4	2	2	1	non-human	incomprehensible	traumatizing	edible	irresponsible	worrying	loss of control	terror	privacy	disturbing	1	Yes	Yes	Yes
30	61	Male	Higher Education	Teacher	porto	1	2	2	2	1	2	2	3	3	2	3	1	2	2	3	3	3	4	3	4	5	non-human	incomprehensible	incomprehensible	unavoidable	irresponsible	misgovernment	loss of control	brutality	integrity	disturbing	2	Yes	Yes	Yes
31	52	Male	Higher Education	Designer	Mangualde	1	3	3	1	4	3	2	2	3	2	3	2	1	3	8	6	5	7	9	4	10	unfair	incomprehensible	avoidable	unavoidable	irresponsible	future	loss of control	disorder	privacy	illness	1	Maybe	Maybe	Yes
32	47	Male	Higher Education	Lecturer	Leiria	1	2	2	1	1	1	1	3	2	3	3	2	3	1	5	6	4	10	7	8	9	non-human	incomprehensible	incomprehensible	unavoidable	irresponsible	worrying	excessive	assault	worrying	epidemic	3	Yes	Yes	Yes
33	40	Female	Higher Education	Marketing & Communication	Aveiro	1	2	2	1	1	1	2	2	2	1	3	4	3	2	1	5	6	9	8	7	10	shocking	traumatizing	incomprehensible	interesting	worrying	worrying	excessive	brutality	worrying	infection	2	Yes	Yes	Yes
34	52	Female	Higher Education	Psicologist	Porto	1	2	2	1	2	2	2	3	2	2	2	4	5	3	7	9	1	10	6	2	8	non-human	impactful	avoidable	nutritious	worrying	worrying	excessive	terror	worrying	disturbing	2	Yes	Yes	Yes
35	44	Female	Higher Education	Adminstrative	Vila Nova de Gaia	1	2	2	2	2	2	2	2	2	3	2	10	9	8	2	4	7	5	1	3	6	non-human	incomprehensible	incomprehensible	repugnant	worrying	future	loss of control	brutality	worrying	virus	1	No	Yes	Yes
36	36	Female	Higher Education	Event Manager	Seixal	1	2	3	1	3	2	2	4	2	2	3	10	9	7	5	6	8	4	5	2	1	non-human	impactful	avoidable	interesting	worrying	worrying	loss of control	brutality	worrying	virus	1	Yes	Yes	Yes
37	36	Male	Higher Education	Engineer	Albergaria-a-Velha	1	2	1	1	2	2	2	4	3	1	3	1	1	1	5	2	3	7	2	1	5	shocking	unfair	loss	repugnant	irresponsible	worrying	excessive	assault	privacy	virus	3	No	Maybe	Maybe
38	40	Female	Higher Education	Teacher	Porto	1	4	2	3	4	5	4	4	1	1	5	3	1	7	2	8	4	9	5	6	10	shocking	unfair	avoidable	interesting	worrying	misgovernment	excessive	brutality	privacy	epidemic	1	Yes	Yes	Yes
39	48	Female	Higher Education	Researcher	Porto	1	1	1	2	3	2	1	1	3	2	4	3	4	9	8	2	1	7	6	5	10	non-human	unfair	pain	unavoidable	worrying	worrying	worrying	terror	worrying	illness	1	Maybe	Maybe	Yes
40	53	Female	Higher Education	Lawyer	Valongo	1	2	2	2	1	2	2	3	1	1	2	1	3	2	4	5	8	9	6	6	6	distressing	incomprehensible	loss	repugnant	worrying	worrying	excessive	terror	worrying	disturbing	2	Maybe	Yes	Yes
41	42	Female	Higher Education	Teacher of Basic and Secondary Education	Albergaria-a-Velha	1	1	1	2	1	1	2	2	1	2	2	1	2	3	6	5	8	9	4	7	10	non-human	unfair	incomprehensible	repugnant	worrying	worrying	excessive	terror	integrity	illness	2	Maybe	Yes	Yes
42	44	Female	Higher Education	Teacher of Basic and Secondary Education	Maia	1	1	1	1	1	1	1	1	1	1	1	1	1	1	1	1	1	1	1	1	1	distressing	impactful	traumatizing	repugnant	irresponsible	worrying	worrying	terror	worrying	disturbing	1	Maybe	Yes	Yes
43	60	Female	Secondary Education	Technical Assistant	Águeda	1	1	1	1	1	1	2	1	1	2	1	2	1	3	4	10	8	9	5	7	6	distressing	incomprehensible	loss	repugnant	irresponsible	worrying	worrying	terror	worrying	virus	2	No	Maybe	Yes
44	45	Male	Higher Education	Commercial	Albergaria-a-Velha	2	2	1	1	3	2	2	3	1	2	3	2	1	5	8	6	7	10	4	3	9	non-human	incomprehensible	avoidable	repugnant	worrying	worrying	loss of control	disorder	privacy	virus	4	Yes	Yes	Yes
45	17	Female	Secondary Education	———-	Aveiro	3	5	3	3	3	4	4	3	4	3	2	6	5	4	10	2	1	7	3	8	9	distressing	impactful	traumatizing	unavoidable	irresponsible	worrying	loss of control	terror	privacy	disturbing	4	No	Maybe	Yes
46	59	Female	Higher Education	Teacher	Gondomar	1	2	2	2	3	3	2	3	3	4	4	1	2	7	3	8	4	9	5	6	10	non-human	incomprehensible	traumatizing	edible	irresponsible	future	excessive	disorder	privacy	infection	2	Maybe	Yes	Yes
47	65	Male	Higher Education	Teacher	Matosinhos	1	1	1	1	2	2	1	3	1	2	3	2	1	3	5	6	4	10	7	8	9	non-human	incomprehensible	avoidable	edible	irresponsible	worrying	loss of control	brutality	privacy	infection	4	No	Yes	Maybe
48	69	Male	Higher Education	Medical Doctor	Matosinhos	1	1	1	2	3	3	3	2	2	3	2	1	1	2	3	3	3	2	2	3	3	shocking	incomprehensible	avoidable	unavoidable	worrying	future	worrying	brutality	worrying	disturbing	2	Yes	Yes	Yes
49	36	Female	Higher Education	Graphic Designer	Porto	1	3	2	2	2	2	2	2	4	3	3	2	2	2	3	2	2	3	4	4	4	unfair	unfair	loss	interesting	irresponsible	worrying	worrying	cruelty	worrying	epidemic	2	Yes	Yes	Yes
50	56	Male	Higher Education	Teacher	Vila do Conde	1	3	3	3	3	3	3	5	3	3	4	1	2	6	10	5	7	8	3	4	9	non-human	unfair	incomprehensible	nutritious	irresponsible	incomprehensible	excessive	disorder	worrying	virus	3	Yes	Yes	Yes
51	60	Male	Higher Education	Architect	Porto	1	3	3	2	3	2	2	3	2	2	4	3	3	2	2	2	2	4	4	4	4	non-human	unfair	incomprehensible	unavoidable	worrying	worrying	worrying	assault	privacy	illness	3	Maybe	Maybe	Yes
52	48	Female	Higher Education	Lecturer	Porto	1	2	1	1	1	1	1	1	2	3	3	7	6	5	1	2	8	3	4	10	9	non-human	incomprehensible	pain	unavoidable	incomprehensive	worrying	loss of control	terror	worrying	disturbing	3	Maybe	Yes	Maybe
53	55	Female	Higher Education	Administrative Coordinator	Gondomar	1	1	1	2	2	2	2	1	1	2	3	1	2	5	10	8	7	3	4	6	9	non-human	incomprehensible	pain	repugnant	worrying	future	loss of control	assault	worrying	virus	1	Yes	Yes	Yes
54	52	Male	Higher Education	Industrial designer	Braga	1	1	3	1	3	1	3	3	1	3	3	1	5	1	5	1	5	5	1	5	5	shocking	unfair	incomprehensible	nutritious	monoxide de carbon monoxide	future	excessive	brutality	privacy	epidemic	3	Maybe	Maybe	Maybe
55	59	Male	Higher Education	Teacher	S. João da Madeira	1	2	1	1	2	1	2	2	2	2	3	3	1	2	4	5	8	9	6	7	10	non-human	incomprehensible	avoidable	unavoidable	irresponsible	worrying	loss of control	disorder	integrity	disturbing	5	Maybe	Maybe	Yes
56	22	Male	Higher Education	Communication Designer	Maia	5	2	2	3	1	4	4	1	2	2	2	4	3	2	10	5	1	9	6	7	8	distressing	shocking	pain	repugnant	worrying	worrying	worrying	terror	worrying	disturbing	4	Yes	Yes	Yes
57	23	Female	Higher Education	Designer	Bragança	1	2	2	3	2	1	1	4	1	1	4	5	6	4	7	9	10	3	8	2	1	unfair	incomprehensible	avoidable	unavoidable	irresponsible	worrying	excessive	disorder	integrity	virus	2	Yes	Yes	Yes
58	42	Female	Higher Education	Cultural Management	Porto	2	2	2	3	2	2	2	2	3	3	4	3	4	7	1	9	5	2	6	8	10	non-human	incomprehensible	traumatizing	unavoidable	irresponsible	misgovernment	excessive	brutality	privacy	virus	2	Yes	Yes	Yes
59	55	Male	Secondary Education	Bank employee	Valongo	1	2	2	2	2	2	2	3	2	2	3	2	2	2	2	2	2	2	2	2	2	non-human	shocking	avoidable	unavoidable	irresponsible	worrying	excessive	brutality	worrying	infection	1	Yes	Yes	Yes
60	51	Male	Higher Education	Lecturer	Valongo	1	2	1	1	1	2	2	4	2	2	3	1	2	3	1	2	2	5	3	3	3	unfair	incomprehensible	pain	repugnant	worrying	worrying	worrying	cruelty	worrying	disturbing	3	Maybe	Yes	Yes
61	49	Male	Higher Education	Teacher	Porto	2	4	3	4	3	4	2	5	3	2	4	5	4	3	9	6	1	10	7	2	8	shocking	unfair	loss	unavoidable	monoxide de carbon monoxide	jeopardize	loss of control	assault	privacy	infection	3	Maybe	Yes	Yes
62	29	Male	Higher Education	Chef de Cuisine	Almada	2	3	3	3	2	4	4	3	3	2	3	1	2	3	4	10	6	9	7	8	5	non-human	traumatizing	pain	edible	ozone	worrying	loss of control	cruelty	privacy	illness	1	Yes	Yes	Yes
63	61	Male	Higher Education	Lecturer	León (Espanha)	1	1	1	2	2	2	1	4	3	3	1	1	5	6	4	7	2	10	8	9	3	non-human	unfair	pain	nutritious	irresponsible	worrying	worrying	brutality	privacy	infection	2	Yes	Yes	Yes
64	70	Male	Higher Education	Teacher	Gondomar	1	2	2	2	3	2	2	3	3	3	2	1	2	1	3	3	3	4	3	3	2	shocking	shocking	loss	unavoidable	worrying	worrying	excessive	cruelty	worrying	disturbing	2	Maybe	Yes	Yes
65	49	Male	Secondary Education	Accounting Technician	Vila Nova de Gaia	2	2	2	1	2	2	1	2	2	2	2	9	7	10	4	6	5	3	2	8	1	shocking	shocking	pain	unavoidable	worrying	worrying	excessive	brutality	privacy	virus	2	Maybe	Maybe	Yes
66	28	Female	Higher Education	Secretariat	Matosinhos	1	3	2	3	2	2	1	3	2	2	3	6	4	5	3	2	1	9	7	8	10	non-human	unfair	incomprehensible	unavoidable	worrying	misgovernment	loss of control	disorder	confidentiality	infection	1	Yes	Yes	Yes
67	74	Male	Higher Education	Sculptor	Matosinhos	1	2	2	2	2	2	2	3	2	2	2	6	7	1	5	4	3	9	2	8	5	non-human	shocking	incomprehensible	repugnant	irresponsible	worrying	loss of control	brutality	worrying	disturbing	2	No	Maybe	Maybe
68	46	Female	Higher Education	Teacher	Coimbra	1	2	2	2	1	2	3	1	2	3	2	1	2	3	3	4	5	4	3	2	5	distressing	unfair	traumatizing	edible	irresponsible	worrying	worrying	cruelty	worrying	disturbing	3	Maybe	Maybe	Maybe
69	54	Female	Higher Education	Bank employee	matosinhos	1	3	2	3	2	3	1	1	2	1	3	3	3	3	3	2	1	2	2	2	4	non-human	unfair	incomprehensible	unavoidable	irresponsible	worrying	loss of control	terror	worrying	disturbing	2	Yes	Yes	Yes
70	48	Female	Higher Education	Veterinary Doctor	Ponte de Lima	1	2	1	1	2	1	1	2	1	3	3	1	4	3	6	5	2	8	7	9	10	non-human	incomprehensible	avoidable	nutritious	irresponsible	future	worrying	brutality	privacy	illness	1	Yes	Yes	Yes
71	53	Female	Higher Education	Treasury Coordination	Gondomar	1	1	1	1	1	1	1	1	1	1	2	2	3	4	6	7	5	8	7	9	10	non-human	shocking	loss	repugnant	worrying	future	loss of control	assault	worrying	virus	2	Maybe	Yes	Yes
72	30	Male	Higher Education	Teacher	Aveiro	1	3	3	3	2	2	1	4	2	2	4	6	3	7	8	2	1	9	4	5	10	non-human	unfair	avoidable	unavoidable	irresponsible	incomprehensible	loss of control	cruelty	integrity	illness	3	No	Maybe	Yes
73	26	Female	Higher Education	Architect	Vila do Conde	2	2	2	4	3	2	2	2	1	1	3	4	3	5	6	7	8	9	2	1	10	non-human	unfair	avoidable	unavoidable	worrying	worrying	incomprehensive	terror	integrity	disturbing	3	Maybe	Yes	Yes
74	58	Male	Higher Education	Lecturer	maia	1	1	1	1	1	1	2	3	2	2	2	2	1	3	5	6	4	9	8	8	8	unfair	unfair	avoidable	edible	incomprehensive	misgovernment	excessive	assault	privacy	infection	1	No	No	Yes
75	22	Female	Higher Education	Student	Lagos	2	3	3	3	2	2	2	2	3	2	3	1	2	8	3	5	4	7	10	6	9	non-human	incomprehensible	avoidable	repugnant	worrying	worrying	loss of control	terror	privacy	infection	2	Maybe	Maybe	Maybe
76	35	Female	Higher Education	Lecturer	Porto	1	1	1	1	2	2	2	3	1	1	1	5	4	3	9	7	8	10	2	1	6	non-human	unfair	loss	nutritious	irresponsible	misgovernment	hypertension	assault	privacy	epidemic	2	Maybe	Yes	Yes
77	53	Female	Higher Education	Lecturer	matosinhos	1	2	2	2	2	1	2	3	2	3	2	1	1	2	3	1	2	3	3	3	2	non-human	incomprehensible	incomprehensible	unavoidable	incomprehensive	worrying	worrying	terror	privacy	epidemic	2	Maybe	Yes	Maybe
78	45	Male	Higher Education	Lecturer	SÃO PAULO - SP / BRASIL	4	5	3	5	5	4	4	3	1	2	5	5	4	10	1	3	10	4	1	2	10	shocking	unfair	loss	interesting	irresponsible	misgovernment	loss of control	disorder	privacy	illness	5	Maybe	Yes	Maybe
79	21	Female	Higher Education	Student	Matosinhos	2	3	2	2	2	2	2	2	2	3	2	1	3	1	4	2	2	3	1	1	2	non-human	incomprehensible	pain	repugnant	worrying	worrying	loss of control	cruelty	confidentiality	disturbing	3	Maybe	Yes	Yes
80	30	Female	Primary and Lower Secondary Education	Designer	Porto	3	4	3	3	5	4	4	5	4	4	4	7	5	6	1	4	1	2	8	3	9	shocking	traumatizing	loss	repugnant	irresponsible	misgovernment	worrying	disorder	confidentiality	infection	2	No	No	Yes
81	23	Female	Higher Education	Communication Designer	V.N. Gaia	1	3	3	3	3	3	3	3	3	2	3	1	2	4	2	8	7	6	3	5	9	non-human	unfair	pain	repugnant	worrying	worrying	excessive	cruelty	privacy	virus	1	Yes	Yes	Yes
82	20	Female	Secondary Education	Student	Santa Maria da Feira	1	1	2	1	2	1	1	2	1	1	2	5	4	2	9	3	1	10	6	7	8	distressing	shocking	pain	repugnant	worrying	worrying	worrying	cruelty	worrying	disturbing	1	Yes	Yes	Yes
83	23	Female	Higher Education	Bakery / Pastry	Caldas da Rainha	1	3	3	2	3	3	2	2	2	2	2	6	7	9	6	6	9	7	8	5	10	unfair	traumatizing	loss	interesting	ozone	worrying	loss of control	cruelty	worrying	virus	3	Maybe	No	Yes
84	19	Female	Higher Education	Student	Braga	3	4	2	2	5	2	3	3	1	1	2	8	6	7	9	3	4	5	1	2	10	non-human	incomprehensible	avoidable	interesting	irresponsible	misgovernment	worrying	cruelty	integrity	disturbing	2	No	No	Yes
85	62	Male	Higher Education	Lecturer	Porto	1	2	2	2	2	2	2	3	2	2	2	2	2	2	2	2	2	3	2	2	2	non-human	incomprehensible	pain	repugnant	irresponsible	worrying	worrying	disorder	worrying	illness	1	Yes	Yes	Yes
86	57	Female	Higher Education	Lecturer	Matosinhos	2	2	2	1	2	1	1	3	3	3	2	2	2	2	2	2	2	3	3	3	2	distressing	incomprehensible	incomprehensible	interesting	irresponsible	misgovernment	loss of control	disorder	privacy	disturbing	2	Maybe	Maybe	Yes
87	21	Female	Higher Education	Student	Viana do Castelo	2	4	4	3	2	2	2	4	4	4	3	2	3	1	9	4	5	10	7	8	6	shocking	traumatizing	avoidable	interesting	worrying	worrying	excessive	cruelty	integrity	disturbing	1	Maybe	Maybe	Yes
88	53	Female	Higher Education	Psychologist	Porto	1	2	2	1	2	2	3	2	1	3	4	2	3	1	9	5	4	8	4	6	7	unfair	incomprehensible	avoidable	nutritious	incomprehensive	worrying	hypertension	cruelty	worrying	disturbing	3	Maybe	Maybe	Yes
89	51	Male	Higher Education	Teacher	Oliveira de Azeméis	1	3	3	2	4	3	3	2	2	2	2	6	5	1	10	8	7	9	2	3	4	non-human	incomprehensible	incomprehensible	interesting	worrying	worrying	loss of control	terror	confidentiality	disturbing	3	Maybe	Maybe	Maybe
90	53	Female	Higher Education	Teacher	Porto	1	3	3	2	2	2	2	3	2	1	3	6	7	4	8	2	3	9	5	1	10	non-human	incomprehensible	avoidable	nutritious	irresponsible	worrying	loss of control	brutality	worrying	epidemic	1	Yes	Yes	Yes
91	49	Female	Higher Education	Teacher	Aveiro	1	3	2	2	4	3	3	4	3	3	4	1	2	3	7	4	8	9	5	6	10	distressing	traumatizing	pain	edible	irresponsible	worrying	worrying	assault	integrity	illness	3	Maybe	Maybe	Yes
92	48	Female	Higher Education	Teacher	Aveiro	1	2	2	3	1	2	1	3	2	2	2	5	6	8	2	7	1	9	4	3	10	distressing	incomprehensible	incomprehensible	nutritious	irresponsible	worrying	worrying	brutality	worrying	infection	3	Maybe	Maybe	Yes
93	41	Female	Higher Education	Illustrator	Porto	1	3	3	2	3	2	3	3	2	3	3	1	5	2	10	7	6	9	4	3	8	non-human	unfair	loss	edible	worrying	worrying	loss of control	disorder	privacy	infection	3	Yes	Yes	Yes
94	59	Female	Higher Education	Financial Advisor	Porto	1	1	1	1	1	1	1	2	1	1	2	1	2	3	6	8	7	9	5	4	10	shocking	shocking	loss	interesting	worrying	future	worrying	terror	worrying	disturbing	2	Yes	Yes	Yes
95	42	Male	Higher Education	Manager.	Braga	1	4	2	4	3	2	2	3	4	2	4	1	3	9	4	8	2	7	6	5	10	unfair	incomprehensible	incomprehensible	unavoidable	worrying	worrying	loss of control	disorder	privacy	virus	2	Yes	Maybe	Yes
96	44	Female	Higher Education	Civil Engineer	Braga	2	2	2	3	3	3	3	4	2	2	4	1	4	2	8	7	6	10	3	5	9	non-human	shocking	incomprehensible	repugnant	worrying	worrying	loss of control	terror	confidentiality	virus	3	Maybe	Maybe	Yes
97	50	Female	Higher Education	Teacher	Maia	1	3	3	4	2	1	2	1	1	1	4	1	1	6	1	1	4	1	1	1	1	shocking	shocking	incomprehensible	repugnant	irresponsible	future	loss of control	brutality	worrying	infection	3	Yes	Yes	Yes
98	54	Male	Higher Education	Architect	Porto	2	1	2	2	3	1	5	2	2	1	2	1	2	3	5	4	10	9	6	7	8	non-human	shocking	pain	edible	irresponsible	jeopardize	excessive	terror	worrying	disturbing	2	Yes	Yes	Yes
99	68	Male	Higher Education	Medical Doctor	Espinho	3	3	4	2	3	1	1	1	3	1	1	2	2	2	2	2	1	2	2	1	2	non-human	unfair	avoidable	nutritious	irresponsible	worrying	loss of control	assault	privacy	epidemic	5	Maybe	Maybe	Yes
100	57	Female	Higher Education	Early Childhood Educator	Espinho	2	3	3	2	3	3	2	1	2	3	4	6	7	4	5	9	2	1	3	8	9	non-human	unfair	avoidable	repugnant	irresponsible	worrying	loss of control	terror	worrying	illness	5	Maybe	Maybe	Yes
101	33	Male	Higher Education	Strategist and Creative Director	Porto	1	3	2	4	1	4	2	5	5	2	5	7	9	5	10	10	9	7	6	7	2	shocking	incomprehensible	incomprehensible	nutritious	irresponsible	future	loss of control	cruelty	privacy	infection	1	Yes	Yes	Yes
102	52	Female	Higher Education	Teacher	Porto	1	3	2	3	2	2	2	3	2	2	3	10	8	4	7	2	3	9	1	5	6	distressing	incomprehensible	avoidable	repugnant	worrying	incomprehensible	loss of control	terror	privacy	illness	3	Yes	Yes	Yes
103	39	Female	Secondary Education	Cashier	Santo Tirso	1	1	1	1	1	1	1	1	1	1	1	1	1	1	1	1	1	1	1	1	1	non-human	unfair	pain	repugnant	worrying	jeopardize	incomprehensive	assault	privacy	epidemic	1	Yes	Yes	Yes
104	59	Male	Higher Education	Architect	Matosinhos	1	3	2	1	3	2	3	4	1	1	3	4	2	7	8	5	9	6	1	3	10	non-human	incomprehensible	incomprehensible	repugnant	irresponsible	worrying	excessive	terror	worrying	infection	1	Yes	Yes	Yes
105	39	Female	Higher Education	Lecturer	Vila Nova de Gaia	1	3	2	2	2	1	1	2	3	3	4	5	4	8	3	2	1	10	6	7	9	distressing	unfair	incomprehensible	repugnant	irresponsible	misgovernment	worrying	disorder	worrying	disturbing	5	Yes	Yes	Yes
106	62	Female	Higher Education	Teacher	Gafanha da Nazaré	1	3	2	1	1	1	1	4	1	2	5	7	8	1	3	1	1	9	1	2	9	non-human	unfair	avoidable	nutritious	irresponsible	worrying	incomprehensive	cruelty	integrity	infection	1	Yes	Yes	Yes
107	67	Male	Higher Education	Teacher	Oliveira de Azeméis	1	1	1	1	1	2	3	1	1	1	2	3	2	1	4	7	6	5	8	9	10	shocking	traumatizing	incomprehensible	repugnant	worrying	worrying	incomprehensive	brutality	worrying	disturbing	1	Maybe	Yes	Yes
108	20	Female	Secondary Education	Student	Cinfães	2	3	3	2	4	3	3	5	2	1	2	9	8	7	10	4	5	9	3	1	2	shocking	unfair	traumatizing	unavoidable	irresponsible	worrying	loss of control	brutality	worrying	disturbing	3	No	Maybe	Maybe
109	59	Female	Higher Education	Teacher	Gondomar	1	2	2	1	2	1	1	2	2	2	2	4	3	1	7	5	2	10	6	9	8	non-human	traumatizing	loss	interesting	worrying	future	excessive	terror	worrying	infection	1	Maybe	Maybe	Yes
110	23	Female	Higher Education	Designer	Porto	1	2	1	1	3	2	1	4	1	2	2	8	7	2	9	1	3	10	6	5	4	shocking	unfair	pain	nutritious	irresponsible	worrying	hypertension	cruelty	worrying	virus	2	No	Maybe	Yes
111	68	Male	Higher Education	Teacher	Maia	2	2	2	2	3	2	2	4	2	3	4	3	1	2	7	4	5	10	6	9	8	distressing	unfair	incomprehensible	edible	worrying	worrying	excessive	assault	worrying	illness	3	Yes	Yes	Yes
112	72	Male	Higher Education	Lecturer	Porto	1	2	2	2	2	2	2	3	3	3	3	1	2	3	4	7	6	9	5	8	10	non-human	incomprehensible	avoidable	interesting	irresponsible	worrying	incomprehensive	brutality	integrity	disturbing	2	Yes	Yes	Yes
113	47	Male	Higher Education	Business Administrator	Porto	2	3	2	3	4	3	3	1	3	2	3	5	4	5	5	4	4	3	4	3	5	impactful	shocking	avoidable	nutritious	worrying	future	worrying	cruelty	worrying	infection	2	Maybe	Maybe	Maybe
114	23	Female	Higher Education	Student	Ílhavo	2	2	2	1	1	1	1	3	2	1	3	3	4	10	5	7	9	2	6	8	1	non-human	incomprehensible	avoidable	nutritious	irresponsible	misgovernment	worrying	terror	integrity	virus	1	Yes	Yes	Yes
115	66	Female	Higher Education	Teacher	Albergaria-a-Velha	1	1	1	1	1	1	1	1	1	1	1	2	1	4	9	7	6	10	3	5	8	non-human	incomprehensible	incomprehensible	interesting	worrying	jeopardize	loss of control	brutality	worrying	disturbing	1	Yes	Yes	Yes
116	57	Male	Higher Education	Teacher	Porto	1	2	2	1	3	2	3	3	2	2	4	1	2	3	4	5	6	6	7	8	9	non-human	incomprehensible	avoidable	edible	irresponsible	worrying	excessive	assault	worrying	virus	1	Yes	Yes	Yes
117	21	Female	Secondary Education	Student	Lousada	1	2	2	3	4	1	2	3	1	2	2	1	1	1	2	1	1	2	1	2	2	distressing	unfair	incomprehensible	unavoidable	irresponsible	worrying	loss of control	brutality	confidentiality	illness	1	Yes	Yes	Yes
118	22	Female	Higher Education	Pastry Chef	Seixal	2	3	2	2	1	2	1	2	1	1	2	3	4	10	5	2	1	6	7	8	9	unfair	traumatizing	incomprehensible	nutritious	worrying	misgovernment	excessive	brutality	worrying	infection	1	Yes	Yes	Yes
119	23	Male	Higher Education	Student	Valongo	5	4	4	3	3	4	4	2	3	3	4	2	3	8	4	5	1	10	6	7	9	unfair	shocking	pain	unavoidable	worrying	worrying	worrying	cruelty	privacy	infection	4	Maybe	Yes	Maybe
120	28	Female	Higher Education	Researcher	Aveiro	5	4	5	5	5	5	5	3	3	4	3	5	4	3	7	1	2	9	3	6	8	shocking	unfair	avoidable	interesting	worrying	jeopardize	hypertension	disorder	integrity	infection	4	Yes	Yes	Yes
121	66	Female	Higher Education	Teacher	Oliveira do Bairro	1	1	1	1	2	1	1	1	1	1	2	1	1	1	2	1	1	1	1	1	2	distressing	incomprehensible	avoidable	interesting	worrying	worrying	worrying	disorder	worrying	disturbing	2	Maybe	Yes	Yes
122	58	Male	Higher Education	CEO	Sintra	1	3	2	2	2	2	2	4	4	3	4	2	1	1	2	1	1	3	3	3	3	non-human	unfair	avoidable	edible	irresponsible	worrying	worrying	brutality	worrying	infection	3	No	No	No
123	50	Female	Higher Education	Teacher	Porto	1	2	1	2	2	1	1	1	1	1	4	3	1	2	9	5	6	8	4	7	10	distressing	incomprehensible	avoidable	nutritious	irresponsible	worrying	worrying	disorder	privacy	disturbing	3	Maybe	Yes	Yes
124	66	Male	Higher Education	TV Operator	Porto	1	3	3	1	2	1	1	2	3	2	2	2	4	2	4	3	5	6	7	8	9	non-human	incomprehensible	avoidable	unavoidable	irresponsible	jeopardize	worrying	terror	privacy	epidemic	3	No	Maybe	Maybe
125	42	Male	Higher Education	Lecturer	Porto	3	2	3	2	3	2	2	4	2	2	3	7	8	1	9	5	4	10	2	3	6	unfair	unfair	avoidable	repugnant	irresponsible	worrying	excessive	terror	privacy	infection	3	No	No	No
126	60	Male	Higher Education	Teacher	Porto	1	1	1	1	1	1	1	2	1	3	3	2	3	4	1	8	5	7	6	9	10	non-human	unfair	pain	repugnant	irresponsible	misgovernment	excessive	assault	worrying	epidemic	3	Yes	Yes	Yes
127	43	Male	Higher Education	Teacher	Porto	1	1	1	1	1	1	1	3	1	3	3	1	2	2	2	3	3	3	1	1	3	distressing	incomprehensible	avoidable	repugnant	irresponsible	jeopardize	worrying	brutality	privacy	disturbing	1	Yes	Yes	Yes
128	55	Female	Secondary Education	Administrative Assistant	Gondomar	1	1	1	3	2	2	2	1	1	2	5	1	2	4	3	9	8	5	6	7	3	shocking	unfair	loss	repugnant	worrying	future	excessive	terror	authenticity	virus	1	Yes	Yes	Yes
129	61	Male	Higher Education	Manager	V. N. De Gaia	3	3	3	3	2	3	2	2	3	2	2	4	4	4	2	3	2	2	3	3	2	impactful	impactful	loss	interesting	worrying	jeopardize	excessive	disorder	privacy	infection	4	No	Maybe	No
130	58	Male	Higher Education	Teacher	Porto	2	3	2	1	3	2	2	3	2	1	4	2	3	1	4	5	4	8	7	6	9	non-human	unfair	pain	repugnant	irresponsible	worrying	loss of control	brutality	worrying	illness	2	No	No	No
131	48	Female	Higher Education	Early Childhood Educator	Gondomar	1	1	1	2	1	2	1	2	1	2	3	1	2	5	4	9	6	3	7	8	10	non-human	shocking	pain	interesting	worrying	jeopardize	worrying	cruelty	worrying	virus	1	Yes	Yes	Yes
132	57	Male	Higher Education	Teacher	Matosinhos	1	2	2	2	2	2	2	3	2	2	3	1	2	4	3	5	8	10	6	7	9	non-human	incomprehensible	avoidable	nutritious	incomprehensive	misgovernment	loss of control	cruelty	integrity	epidemic	4	Maybe	Maybe	Maybe
133	53	Male	Higher Education	Designer	Porto	1	2	1	2	3	2	2	4	2	2	3	1	2	3	8	4	5	9	4	6	7	unfair	unfair	avoidable	repugnant	irresponsible	misgovernment	worrying	disorder	confidentiality	infection	4	Maybe	Yes	Yes
134	42	Male	Secondary Education	Gas Network Installer	Albergaria a velha	3	2	2	2	1	3	3	4	2	2	3	6	5	4	1	8	10	7	2	3	9	shocking	incomprehensible	avoidable	edible	ozone	future	worrying	terror	privacy	infection	2	Maybe	Maybe	Yes
135	61	Male	Secondary Education	Fashion Pattern Maker	Valongo	3	3	3	2	2	3	3	4	2	2	2	3	3	2	2	3	3	4	2	2	2	non-human	incomprehensible	avoidable	edible	worrying	future	excessive	disorder	worrying	disturbing	5	No	Yes	Yes
136	90	Undefined	Secondary Education	Public servant	Vila do Conde	1	5	1	1	1	1	1	1	1	1	1	1	1	1	1	1	1	2	1	2	2	shocking	incomprehensible	incomprehensible	unavoidable	irresponsible	worrying	excessive	brutality	worrying	epidemic	4	Maybe	Maybe	Yes
137	60	Male	Higher Education	Designer	Maia	5	4	4	4	3	3	4	1	4	4	3	10	7	8	2	5	9	3	4	8	1	distressing	shocking	avoidable	unavoidable	worrying	future	worrying	brutality	worrying	infection	3	Maybe	Maybe	Yes
138	74	Male	Higher Education	Veterinarian	Beja	2	2	2	1	2	2	2	3	3	2	3	3	3	2	3	3	2	3	3	3	3	non-human	traumatizing	incomprehensible	repugnant	irresponsible	worrying	excessive	assault	worrying	infection	2	Maybe	Yes	Yes
139	59	Male	Higher Education	Administrator	Ovar	5	4	5	4	4	3	4	2	4	4	2	1	2	8	5	7	3	10	4	6	9	non-human	shocking	incomprehensible	interesting	worrying	misgovernment	loss of control	disorder	integrity	virus	4	Maybe	Maybe	Yes
140	46	Female	Higher Education	Public Relations and Communications Coordinator	Matosinhos	1	3	2	2	2	1	2	2	2	2	3	6	2	3	7	1	1	8	5	4	9	non-human	incomprehensible	avoidable	edible	irresponsible	worrying	loss of control	disorder	integrity	virus	3	Maybe	Maybe	Yes
141	48	Male	Higher Education	Lecturer	Porto	1	3	2	1	3	2	1	3	1	2	2	3	5	1	9	8	2	10	4	6	7	distressing	shocking	pain	interesting	irresponsible	future	loss of control	brutality	privacy	epidemic	3	Maybe	Maybe	Yes
142	52	Male	Higher Education	Architect	pORTO	2	2	2	1	2	1	2	3	3	3	2	2	3	1	4	5	6	10	7	8	9	non-human	incomprehensible	avoidable	interesting	irresponsible	worrying	excessive	brutality	integrity	infection	1	Yes	Yes	Yes
143	47	Female	Higher Education	Food Engineer	Setúbal	1	2	2	2	1	2	2	1	2	2	3	3	1	2	4	5	8	9	6	7	10	non-human	traumatizing	avoidable	repugnant	irresponsible	future	worrying	terror	privacy	infection	1	Yes	Yes	Yes
144	48	Female	Higher Education	Lecturer	Vila Nova de Gaia	2	3	2	2	1	1	2	3	2	1	2	4	2	7	6	5	3	8	5	1	2	non-human	unfair	avoidable	repugnant	worrying	worrying	worrying	disorder	worrying	disturbing	2	Maybe	Yes	Yes
145	44	Female	Higher Education	Teacher	Porto	2	3	1	2	3	2	3	3	1	2	3	1	2	1	2	2	3	3	1	1	5	shocking	incomprehensible	avoidable	nutritious	irresponsible	worrying	excessive	brutality	worrying	illness	3	Maybe	Maybe	No
146	54	Male	Secondary Education	Commercial	Carregal do Sal	1	5	1	1	3	1	1	5	3	1	1	1	1	1	1	1	1	3	3	1	1	non-human	incomprehensible	avoidable	edible	irresponsible	worrying	loss of control	disorder	worrying	disturbing	1	Maybe	Yes	Yes
147	74	Male	Higher Education	Lecturer	Esposende	1	1	1	1	1	1	2	1	1	1	3	2	2	1	3	8	6	10	9	4	10	non-human	incomprehensible	avoidable	unavoidable	worrying	worrying	worrying	cruelty	worrying	infection	2	Maybe	Maybe	Yes
148	49	Female	Higher Education	Accountant	Gondomar	1	1	1	3	3	1	3	1	1	4	4	1	3	4	5	6	7	8	9	10	5	non-human	incomprehensible	traumatizing	edible	worrying	misgovernment	loss of control	cruelty	privacy	epidemic	1	Yes	Maybe	Maybe
149	66	Female	Higher Education	?	Matosinhos	1	2	2	2	1	1	1	2	1	2	3	4	5	1	6	2	3	9	7	8	9	shocking	incomprehensible	incomprehensible	repugnant	irresponsible	worrying	excessive	terror	worrying	infection	4	Maybe	Yes	Yes
150	53	Female	Secondary Education	Administrative assistant	Vila Nova de Gaia	1	2	3	2	2	1	1	2	1	2	3	1	2	3	4	3	3	5	5	5	6	shocking	incomprehensible	incomprehensible	unavoidable	worrying	worrying	incomprehensive	terror	worrying	illness	1	Maybe	Yes	Yes
151	21	Female	Higher Education	Student	Vila Nova de Gaia	1	3	1	3	2	1	1	4	1	4	2	2	1	4	9	6	5	10	3	7	8	non-human	unfair	incomprehensible	repugnant	irresponsible	worrying	excessive	terror	worrying	disturbing	3	Maybe	Maybe	Yes
152	63	Female	Secondary Education	Housekeeper	Gondomar	5	4	5	5	5	5	5	3	5	5	4	3	3	3	3	3	3	2	3	3	2	unfair	unfair	incomprehensible	repugnant	worrying	worrying	worrying	cruelty	worrying	disturbing	5	Maybe	Maybe	Maybe
153	53	Female	Higher Education	Teacher	Sever do Vouga	1	2	2	1	2	2	1	4	2	3	3	3	6	2	4	5	1	9	7	8	10	non-human	incomprehensible	avoidable	edible	irresponsible	worrying	loss of control	cruelty	privacy	disturbing	2	Yes	Yes	Yes
154	67	Female	Higher Education	Economist	Gondomar	1	1	1	1	1	1	1	1	1	1	2	1	2	3	7	5	6	4	8	9	10	non-human	shocking	loss	repugnant	irresponsible	worrying	worrying	cruelty	worrying	illness	1	Maybe	Maybe	Yes
155	35	Female	Higher Education	Researcher	Gondomar	1	2	1	1	2	1	1	2	1	2	2	3	1	2	9	5	4	10	7	8	6	non-human	incomprehensible	incomprehensible	unavoidable	irresponsible	worrying	worrying	brutality	worrying	virus	3	Yes	Yes	Yes
156	46	Female	Higher Education	Teacher	Esposende	1	3	3	2	2	2	2	4	3	3	4	5	4	6	2	3	1	10	8	7	9	non-human	incomprehensible	avoidable	unavoidable	irresponsible	worrying	worrying	disorder	privacy	virus	3	Maybe	Maybe	Maybe
157	46	Female	Higher Education	Local Accommodation Manager	Silves	3	3	3	2	3	3	3	4	4	3	4	1	2	4	3	5	4	8	4	5	8	shocking	unfair	avoidable	nutritious	irresponsible	worrying	worrying	disorder	privacy	epidemic	3	Yes	Yes	Yes
158	32	Male	Higher Education	Teacher	Valongo	2	3	3	2	3	3	2	2	2	3	3	2	1	5	10	6	9	3	4	7	8	shocking	shocking	pain	interesting	monóxido de carbon monoxide	worrying	excessive	brutality	privacy	virus	2	Maybe	Yes	Yes
159	29	Female	Higher Education	Communication Manager	Porto	1	2	2	1	2	2	2	3	2	3	3	8	2	1	4	3	5	6	7	9	10	non-human	incomprehensible	avoidable	interesting	irresponsible	misgovernment	worrying	cruelty	privacy	disturbing	3	Maybe	Maybe	Yes
160	55	Female	Primary and Lower Secondary Education	Administrative	Gondomar	1	2	2	2	2	2	2	2	2	2	2	2	2	2	2	2	2	2	2	2	2	non-human	incomprehensible	avoidable	unavoidable	worrying	worrying	worrying	brutality	worrying	disturbing	2	Yes	Yes	Yes
161	31	Female	Higher Education	Interior Designer	Porto	2	4	3	4	1	1	1	4	3	1	3	2	5	8	6	7	1	8	4	3	9	non-human	incomprehensible	pain	repugnant	worrying	worrying	incomprehensive	brutality	worrying	infection	1	Maybe	Maybe	Yes
162	51	Female	Higher Education	Teacher	Matosinhos	2	2	2	2	3	2	3	3	3	3	3	1	3	2	6	4	7	10	5	8	9	non-human	incomprehensible	avoidable	unavoidable	irresponsible	misgovernment	loss of control	disorder	integrity	disturbing	2	Maybe	Yes	Yes
163	36	Male	Higher Education	Design Manager	Porto	1	3	2	3	3	2	2	4	5	4	4	2	1	10	9	3	4	8	5	6	7	non-human	unfair	avoidable	interesting	irresponsible	misgovernment	incomprehensive	brutality	privacy	infection	3	Yes	Yes	Yes
164	50	Female	Secondary Education	Technical Assistant	Maia	1	2	2	1	1	1	1	3	2	2	3	1	1	1	1	1	1	5	4	4	4	non-human	incomprehensible	pain	unavoidable	worrying	worrying	worrying	terror	worrying	disturbing	1	Yes	Yes	Yes
165	29	Female	Higher Education	Musician	Porto	1	3	3	3	2	2	2	5	4	4	4	4	8	2	9	7	1	10	3	6	5	non-human	incomprehensible	avoidable	interesting	worrying	worrying	worrying	disorder	worrying	disturbing	2	No	No	Yes
166	59	Male	Higher Education	Civil Engineer	Matosinhos	1	3	2	4	3	2	3	4	4	2	4	4	1	10	5	3	2	7	8	6	9	non-human	incomprehensible	avoidable	edible	irresponsible	misgovernment	excessive	brutality	worrying	virus	3	Yes	Yes	Maybe
167	22	Male	Higher Education	Student	Cascais	4	2	2	4	1	2	2	1	3	3	1	4	5	6	1	7	10	2	8	9	3	non-human	incomprehensible	incomprehensible	repugnant	irresponsible	worrying	worrying	cruelty	confidentiality	virus	3	Maybe	Yes	Yes
168	18	Female	Secondary Education	Student	Vila Real de Santo António	1	2	2	2	4	2	2	3	2	2	3	1	2	3	10	4	5	8	6	7	9	non-human	impactful	traumatizing	repugnant	irresponsible	worrying	worrying	cruelty	worrying	virus	2	Yes	Yes	Yes
169	22	Male	Higher Education	Food & Beverage	Évora	4	3	4	4	1	3	2	1	2	4	3	6	9	8	1	5	3	2	4	10	7	distressing	unfair	loss	interesting	irresponsible	worrying	loss of control	cruelty	authenticity	disturbing	2	Maybe	Yes	Yes
170	62	Female	Secondary Education	Technical Assistant	Oeiras	1	1	1	1	1	1	1	1	1	1	3	1	1	1	1	1	1	2	1	1	3	non-human	unfair	avoidable	repugnant	irresponsible	future	loss of control	terror	worrying	disturbing	1	No	Maybe	Yes
171	34	Male	Higher Education	Librarian	Cascais	1	5	1	1	1	2	2	4	2	1	5	9	1	1	5	1	1	7	1	1	10	impactful	impactful	loss	unavoidable	incomprehensible	misgovernment	worrying	disorder	integrity	infection	5	Maybe	Maybe	Maybe
172	20	Female	Primary and Lower Secondary Education	Student	cascais	5	4	4	2	3	5	4	1	4	5	2	6	8	2	4	8	7	2	6	5	2	impactful	unfair	incomprehensible	interesting	worrying	future	worrying	cruelty	integrity	infection	3	Yes	Yes	Yes
173	18	Male	Higher Education	Student	Cascais	2	3	3	3	3	2	2	3	3	2	3	5	4	3	6	2	1	3	4	3	3	distressing	traumatizing	incomprehensible	interesting	worrying	worrying	worrying	cruelty	worrying	disturbing	3	Yes	Yes	Yes
174	53	Male	Higher Education	Hotel Director	Lisboa	2	4	4	3	5	3	3	4	4	3	4	2	6	4	7	3	5	10	9	8	8	shocking	shocking	pain	unavoidable	worrying	worrying	incomprehensible	terror	privacy	disturbing	5	Maybe	Maybe	Yes
175	24	Female	Secondary Education	Student	Barreiro	1	2	2	1	2	2	1	2	3	2	4	2	3	1	8	4	5	5	6	7	9	distressing	unfair	pain	repugnant	worrying	worrying	loss of control	brutality	confidentiality	illness	2	Yes	Yes	Yes
176	18	Female	Higher Education	Student	Odivelas	5	4	4	4	4	4	4	4	4	4	4	9	10	8	1	4	7	2	6	5	3	non-human	incomprehensible	avoidable	repugnant	irresponsible	misgovernment	worrying	disorder	integrity	disturbing	2	Yes	Yes	Yes
177	20	Female	Secondary Education	Student	Seixal	4	3	4	2	4	4	4	3	4	4	4	4	6	3	9	8	10	2	6	5	1	impactful	impactful	avoidable	interesting	irresponsible	future	worrying	disorder	privacy	infection	3	Maybe	Maybe	Yes
178	47	Male	Higher Education	Lecturer	Sintra	1	3	3	2	3	3	2	3	3	2	3	3	4	2	8	6	1	10	5	7	9	non-human	incomprehensible	pain	repugnant	irresponsible	future	excessive	terror	worrying	disturbing	3	Maybe	Maybe	Yes
179	23	Female	Higher Education	Student	Cascais	1	2	2	2	2	2	1	1	1	2	2	1	2	3	5	4	3	3	3	2	3	impactful	shocking	traumatizing	interesting	worrying	worrying	loss of control	cruelty	privacy	infection	3	Maybe	Maybe	Yes
180	60	Female	Higher Education	Higher Technician	Lisboa	1	3	2	1	1	1	1	3	1	1	1	2	2	1	1	1	1	5	3	2	1	shocking	shocking	avoidable	repugnant	irresponsible	worrying	excessive	terror	privacy	illness	4	Maybe	Yes	Maybe
181	55	Male	Higher Education	Teacher	Sintra	1	2	1	1	2	1	1	4	1	2	4	1	2	4	9	5	3	9	7	6	8	non-human	shocking	pain	unavoidable	worrying	misgovernment	worrying	disorder	worrying	illness	2	Maybe	Yes	Yes
182	23	Female	Higher Education	Student	Sintra	1	1	1	2	1	1	1	2	2	2	4	1	2	4	3	8	7	9	6	5	9	distressing	unfair	pain	repugnant	worrying	future	worrying	disorder	privacy	disturbing	1	Yes	Yes	Yes
183	20	Male	Higher Education	Unemployed	Abrantes	3	2	2	2	4	2	3	2	2	2	2	1	5	2	6	3	4	7	8	9	10	shocking	unfair	loss	repugnant	irresponsible	misgovernment	worrying	cruelty	worrying	infection	4	Yes	Yes	Yes
184	21	Female	Higher Education	Student	Porto	2	4	3	2	3	2	2	3	2	2	3	3	4	7	9	2	1	8	6	5	10	shocking	incomprehensible	pain	interesting	incomprehensible	worrying	worrying	brutality	integrity	infection	2	Yes	Maybe	Yes
185	22	Male	Higher Education	Waiter	Cascais	2	3	2	1	1	2	2	3	1	2	1	3	2	1	4	5	6	10	8	9	7	distressing	unfair	incomprehensible	edible	worrying	worrying	worrying	disorder	privacy	infection	3	No	Yes	Maybe
186	59	Male	Higher Education	Teacher	Benavente	2	2	2	2	2	2	2	2	2	2	2	2	3	1	2	3	3	2	3	3	3	non-human	incomprehensible	traumatizing	interesting	irresponsible	misgovernment	excessive	brutality	worrying	infection	2	Yes	Yes	Maybe
187	20	Female	Higher Education	Student	Lagos	2	3	1	3	5	2	1	2	2	2	3	2	1	6	10	4	3	7	5	9	8	non-human	incomprehensible	traumatizing	repugnant	worrying	worrying	loss of control	terror	privacy	disturbing	4	Yes	Yes	Yes
188	55	Male	Higher Education	Translator	Setúbal	4	4	4	3	2	2	2	4	3	3	4	6	5	1	4	2	3	10	7	8	9	shocking	shocking	loss	interesting	irresponsible	worrying	excessive	assault	confidentiality	virus	2	Maybe	Maybe	Maybe
189	49	Male	Higher Education	Chef de Cuisine	Almada	2	3	2	2	2	2	3	3	2	2	4	2	2	2	2	2	3	3	3	3	4	distressing	incomprehensible	traumatizing	interesting	irresponsible	worrying	loss of control	terror	worrying	illness	2	Yes	Yes	Yes
190	22	Female	Higher Education	Event Organizer	almada	1	2	2	2	3	2	2	3	1	2	3	2	3	4	8	6	5	9	1	7	10	non-human	impactful	loss	repugnant	worrying	worrying	excessive	assault	privacy	illness	3	Yes	Yes	Yes
191	19	Female	Secondary Education	Student	Maia	5	2	3	3	3	4	5	2	4	4	3	3	4	8	6	9	10	1	5	7	2	shocking	unfair	incomprehensible	repugnant	irresponsible	worrying	loss of control	cruelty	privacy	epidemic	3	No	Yes	Yes
192	48	Female	Higher Education	Lecturer	Lisboa	1	1	1	1	1	1	1	1	1	1	2	5	5	5	5	5	5	5	5	5	4	distressing	shocking	incomprehensible	unavoidable	worrying	misgovernment	loss of control	cruelty	worrying	infection	1	Yes	Yes	Yes
193	43	Male	Higher Education	Sommelier	Cascais	5	4	3	3	4	4	3	3	3	3	3	8	9	2	7	6	5	5	5	5	5	non-human	incomprehensible	traumatizing	edible	irresponsible	jeopardize	excessive	brutality	integrity	infection	4	Yes	Yes	Yes
194	19	Female	Secondary Education	Student	Oeiras	1	3	2	3	2	1	1	2	3	2	4	1	2	3	8	7	6	9	4	5	10	unfair	shocking	traumatizing	nutritious	worrying	misgovernment	excessive	cruelty	worrying	disturbing	3	Yes	Yes	Yes
195	44	Male	Secondary Education	Chef de Cuisine	Lisboa	3	3	2	2	2	2	2	2	2	3	3	3	2	1	4	5	6	7	8	9	10	non-human	incomprehensible	traumatizing	nutritious	irresponsible	incomprehensible	loss of control	terror	privacy	epidemic	3	Yes	Yes	Yes
196	18	Female	Secondary Education	Student	Sobral de Monte Agraço	1	4	4	3	2	2	2	4	3	2	2	4	5	9	1	3	4	2	7	6	8	non-human	impactful	loss	interesting	worrying	worrying	excessive	terror	confidentiality	virus	3	Maybe	Maybe	Yes
197	49	Female	Higher Education	Jornalist	cascais	1	3	3	2	1	1	1	3	3	3	4	1	1	1	2	1	1	3	1	1	2	non-human	unfair	incomprehensible	edible	irresponsible	misgovernment	loss of control	disorder	worrying	illness	3	Yes	Yes	Yes
198	41	Male	Higher Education	Statistician	Porto	1	2	2	2	2	2	3	3	3	3	4	2	1	4	5	3	8	9	6	7	10	unfair	unfair	incomprehensible	interesting	incomprehensible	worrying	worrying	brutality	privacy	infection	2	Maybe	Maybe	Maybe
199	19	Female	Secondary Education	Student	Lisboa	1	2	1	2	3	1	1	3	3	3	3	4	3	7	10	2	1	9	6	5	8	non-human	unfair	pain	repugnant	worrying	worrying	loss of control	terror	worrying	disturbing	3	Yes	Yes	Yes
200	49	Male	Higher Education	Cook	Cascais	1	3	2	4	1	2	2	1	2	2	4	2	7	6	9	3	1	3	4	5	8	non-human	shocking	avoidable	interesting	worrying	worrying	worrying	cruelty	worrying	disturbing	4	Maybe	Yes	Yes
201	57	Female	Higher Education	Teacher	Cascais	1	2	2	2	2	2	2	2	2	2	2	2	3	1	4	5	6	7	8	9	10	unfair	incomprehensible	incomprehensible	repugnant	monóxido de carbon monoxide	worrying	loss of control	brutality	worrying	disturbing	2	Yes	Yes	Yes
202	38	Female	Higher Education	Nutritionist	Brasil	1	1	1	1	1	3	3	1	1	1	3	4	3	7	5	9	8	6	2	1	9	distressing	unfair	loss	interesting	worrying	worrying	worrying	terror	privacy	illness	3	Yes	Yes	Yes
203	61	Male	Higher Education	Teacher	Lisboa	2	3	3	3	4	3	2	3	3	3	4	2	3	4	5	6	1	9	8	7	10	non-human	incomprehensible	avoidable	nutritious	irresponsible	worrying	worrying	disorder	privacy	infection	2	Maybe	Maybe	Maybe
204	52	Male	Higher Education	Teacher	Lisboa	1	2	1	2	2	2	1	2	2	3	3	2	1	4	4	3	2	4	3	5	5	non-human	incomprehensible	avoidable	edible	irresponsible	worrying	excessive	brutality	privacy	illness	3	Yes	Yes	Yes
205	21	Male	Secondary Education	Shelf stocker	Cascais	4	3	3	4	3	4	3	2	3	4	3	6	5	8	4	3	9	2	5	6	4	non-human	impactful	avoidable	unavoidable	worrying	future	excessive	brutality	privacy	virus	4	Maybe	Yes	Yes
206	45	Female	Higher Education	Instructor	Cascais	5	5	5	3	5	5	5	4	5	5	5	2	2	3	2	2	2	3	2	2	2	distressing	shocking	pain	edible	worrying	incomprehensible	excessive	assault	confidentiality	epidemic	1	Yes	Yes	Yes
207	20	Male	Secondary Education	Student	SeYesbra	2	4	3	2	1	3	3	5	2	2	3	4	3	1	9	7	10	8	2	5	6	shocking	impactful	pain	interesting	irresponsible	incomprehensible	worrying	disorder	worrying	virus	2	Yes	Maybe	Yes
208	50	Female	Higher Education	Psychologist	gondomar	3	1	3	3	3	2	4	4	4	3	1	3	2	7	4	8	1	8	6	5	9	distressing	incomprehensible	loss	repugnant	worrying	misgovernment	loss of control	assault	confidentiality	infection	3	No	Maybe	Yes
209	70	Male	Higher Education	Architect	Lisboa	1	2	2	2	3	3	4	4	2	2	3	3	1	2	7	5	9	10	4	6	8	non-human	shocking	incomprehensible	repugnant	irresponsible	misgovernment	loss of control	brutality	worrying	illness	5	No	Maybe	Maybe
210	56	Female	Higher Education	Librarian	Oeiras	1	1	1	1	1	1	1	2	2	2	3	1	1	1	1	2	2	3	1	1	2	non-human	shocking	avoidable	repugnant	irresponsible	worrying	loss of control	brutality	worrying	disturbing	2	Yes	Yes	Yes
211	49	Male	Higher Education	Manager	Ponta Delgada	2	3	2	2	4	3	3	4	3	3	4	2	1	6	3	5	4	8	10	9	7	shocking	incomprehensible	loss	repugnant	worrying	worrying	incomprehensible	disorder	privacy	virus	5	Maybe	Maybe	Yes
212	61	Male	Higher Education	Teacher	Oeiras	2	1	1	1	2	2	2	3	2	1	1	1	2	3	5	9	8	6	7	3	2	shocking	unfair	incomprehensible	edible	irresponsible	worrying	excessive	brutality	privacy	virus	2	No	Yes	Yes
213	24	Female	Higher Education	Unemployed	Sintra	1	2	2	2	3	1	1	4	2	4	1	5	4	6	8	2	1	9	7	10	3	distressing	unfair	incomprehensible	repugnant	worrying	worrying	loss of control	disorder	privacy	disturbing	1	Maybe	Maybe	Yes
214	18	Female	Secondary Education	Student	lisboa	3	3	2	4	2	2	3	5	4	4	3	8	9	3	7	6	5	1	3	4	2	shocking	shocking	pain	repugnant	worrying	worrying	worrying	cruelty	integrity	disturbing	2	Maybe	Maybe	Yes
215	50	Female	Higher Education	Economist	Porto	2	2	2	2	3	2	2	2	2	3	3	3	1	2	10	4	5	6	7	8	9	non-human	incomprehensible	loss	nutritious	irresponsible	worrying	worrying	terror	worrying	epidemic	3	Yes	Yes	Yes
216	51	Female	Higher Education	Teacher	Lisboa	1	1	1	1	1	1	1	1	1	2	2	2	2	3	3	3	4	3	3	4	3	impactful	incomprehensible	loss	nutritious	worrying	future	worrying	brutality	privacy	infection	2	Yes	Yes	Yes
217	19	Female	Secondary Education	Student	Oeiras	1	2	2	2	3	1	2	3	1	1	3	5	4	2	7	3	6	9	1	8	10	non-human	impactful	pain	repugnant	incomprehensible	future	loss of control	terror	integrity	virus	3	Yes	Maybe	Yes
218	21	Female	Secondary Education	Student	Vila Franca de Xira	2	2	2	2	4	3	3	3	3	1	5	10	8	9	2	5	4	6	7	3	1	non-human	traumatizing	traumatizing	repugnant	worrying	worrying	worrying	cruelty	integrity	epidemic	2	Maybe	Yes	Yes
																																										Data

## Sheet: Table 2
	Baby Boomers	Generation X	Millennials	Generation Z	Scale
Hunger	34	20	14	7	1
	33	36	29	35	2
	27	31	34	35	3
	3	9	20	21	4
	3	4	3	2	5	100	100	100	100
Poverty	24	24	26	33	1
	47	45	43	42	2
	23	18	31	21	3
	3	10	0	2	4
	3	3	0	2	5	100	100	100	100
War	17	33	29	40	1
	50	39	31	35	2
	23	16	31	19	3
	10	10	6	6	4
	0	2	3	0	5	100	100	100	100
Future Food	23	27	17	25	1
	30	31	54	29	2
	30	27	23	29	3
	10	10	0	13	4
	7	5	6	4	5	100	100	100	100
Pollution	27	34	26	23	1
	40	45	49	44	2
	20	14	11	21	3
	10	4	14	8	4
	3	3	0	4	5	100	100	100	100
Climate Change	26	34	29	25	1
	30	39	49	43	2
	30	19	11	17	3
	7	5	11	13	4
	7	3	0	2	5	100	100	100	100
Obesity	13	20	17	19	1
	27	23	29	23	2
	33	30	34	33	3
	20	23	11	21	4
	7	4	9	4	5	100	100	100	100
Violence	17	32	26	27	1
	37	34	45	33	2
	33	20	23	21	3
	10	12	6	17	4
	3	2	0	2	5	100	100	100	100
Security	18	24	17	23	1
	33	42	49	41	2
	33	21	31	19	3
	13	11	3	15	4
	3	2	0	2	5	100	100	100	100
Pandemics	10	8	6	10	1
	13	28	31	27	2
	47	34	40	38	3
	23	26	20	17	4
	7	4	3	8	5	100	100	100	100

## Sheet: Hunger
	Question 1	Question 2	Question 3	Question 4	Question 7
1	17	Female	Secondary Education	———-	5	1
2	18	Female	Secondary Education	Student	2	2
3	18	Male	Higher Education	Student	3	3
4	18	Female	Higher Education	Student	4	4
5	18	Female	Secondary Education	Student	4	5
6	18	Female	Secondary Education	Student	3	6
7	19	Female	Higher Education	Student	4	7
8	19	Female	Secondary Education	Student	2	8
9	19	Female	Secondary Education	Student	3	9
10	19	Female	Secondary Education	Student	2	10
11	19	Female	Secondary Education	Student	2	11
12	20	Female	Secondary Education	Student	1	12
13	20	Female	Secondary Education	Student	3	13
14	20	Female	Primary and Lower Secondary Education	Student	4	14
15	20	Female	Secondary Education	Student	3	15
16	20	Male	Higher Education	Unemployed	2	16
17	20	Female	Higher Education	Student	3	17
18	20	Male	Secondary Education	Student	4	18
19	21	Female	Higher Education	Student	3	19
20	21	Female	Higher Education	Student	4	20
21	21	Female	Secondary Education	Student	2	21
22	21	Female	Higher Education	Student	3	22
23	21	Female	Higher Education	Student	4	23
24	21	Male	Secondary Education	Depositor	3	24
25	21	Female	Secondary Education	Student	2	25
26	22	Male	Secondary Education	Student	1	26
27	22	Female	Higher Education	Student	4	27
28	22	Male	Higher Education	Communication Designer	2	28
29	22	Female	Higher Education	Student	3	29
30	22	Female	Higher Education	Pastry Chef	3	30
31	22	Male	Higher Education	Student	2	31
32	22	Male	Higher Education	Food & Beverage	3	32
33	22	Male	Higher Education	Waiter	3	33
34	22	Female	Higher Education	Event Organizer	2	34
35	23	Female	Higher Education	Designer	2	35
36	23	Female	Higher Education	Communication Designer	3	36
37	23	Female	Higher Education	Bakery / Pastry	3	37
38	23	Female	Higher Education	Designer	2	38
39	23	Female	Higher Education	Student	2	39
40	23	Male	Higher Education	Student	4	40
41	23	Female	Higher Education	Student	2	41
42	23	Female	Higher Education	Student	1	42
43	24	Female	Secondary Education	Student	2	43
44	24	Female	Higher Education	Unemployed	2	44
45	25	Male	Higher Education	Medical Doctor	3	45
46	26	Female	Higher Education	Architect	2	46
47	28	Female	Higher Education	Secretariat.	3	47
48	28	Female	Higher Education	Researcher	4	48
1	29	Male	Higher Education	Chef de cuisine	3	1
2	29	Female	Higher Education	Communication Manager	2	2
3	29	Female	Higher Education	Musician	3	3
4	30	Male	Higher Education	Professor	3	4
5	30	Female	Primary and Lower Secondary Education	Designer	4	5
6	31	Female	Higher Education	Higher technical staff	3	6
7	31	Female	Higher Education	Interior Designer	4	7
8	32	Male	Higher Education	Professor	3	8
9	33	Female	Higher Education	Designer	2	9
10	33	Male	Higher Education	Strategist and Creative Director.	3	10
11	34	Male	Higher Education	Librarian	5	11
12	35	Female	Higher Education	Lecturer	1	12
13	35	Female	Higher Education	Researcher	2	13
14	36	Female	Higher Education	Graphic Designer	3	14
15	36	Female	Higher Education	Even Manager	2	15
16	36	Male	Higher Education	Engineer	2	16
17	36	Female	Higher Education	Graphic Designer	3	17
18	36	Male	Higher Education	Design Manager	3	18
19	38	Male	Higher Education	Engineer	4	19
20	38	Female	Higher Education	Nutritionist	1	20
21	39	Female	Secondary Education	Cashier	1	21
22	39	Female	Higher Education	Lecturer	3	22
23	40	Female	Higher Education	Marketing & Communication	2	23
24	40	Female	Higher Education	Professor	4	24
25	41	Male	Higher Education	Medical Doctor	4	25
26	41	Female	Higher Education	Illustrator	3	26
27	41	Male	Higher Education	Statistician	2	27
28	42	Female	Higher Education	Professor	1	28
29	42	Female	Higher Education	Cultural Management	2	29
30	42	Male	Higher Education	Manager	4	30
31	42	Male	Higher Education	Lecturer	2	31
32	42	Male	Secondary Education	Gas Network Installer	2	32
33	43	Male	Higher Education	Professor	3	33
34	43	Male	Higher Education	Professor	1	34
35	43	Male	Higher Education	Sommelier	4	35
1	44	Female	Higher Education	Administrative	2	1
2	44	Female	Higher Education	Professor	1	2
3	44	Female	Higher Education	Civil Engineer	2	3
4	44	Female	Higher Education	Professor	3	4
5	44	Male	Secondary Education	Chef de cuisine	3	5
6	45	Male	Higher Education	Commercial	2	6
7	45	Male	Higher Education	Lecturer	5	7
8	45	Female	Higher Education	Instructor	5	8
9	46	Female	Higher Education	Professor	2	9
10	46	Female	Higher Education	Public Relations and Communications Coordinator.	3	10
11	46	Female	Higher Education	Professor	3	11
12	46	Female	Higher Education	Local Accommodation Manager	3	12
13	47	Male	Higher Education	Engineer	4	13
14	47	Male	Higher Education	Professor	2	14
15	47	Male	Higher Education	Business Administrator.	3	15
16	47	Female	Higher Education	Food Engineer	2	16
17	47	Male	Higher Education	Lecturer	3	17
18	48	Male	Higher Education	Engineer	4	18
19	48	Female	Higher Education	Professor	1	19
20	48	Female	Higher Education	Researcher	1	20
21	48	Female	Higher Education	Professor	2	21
22	48	Female	Higher Education	Veterinarian	2	22
23	48	Female	Higher Education	Professor	2	23
24	48	Female	Higher Education	Early Childhood Educator.	1	24
25	48	Male	Higher Education	Lecturer	3	25
26	48	Female	Higher Education	Lecturer	3	26
27	48	Female	Higher Education	Lecturer	1	27
28	49	Female	Higher Education	Lecturer	3	28
29	49	Male	Higher Education	Professor	4	29
30	49	Male	Secondary Education	Accounting Technician	2	30
31	49	Female	Higher Education	Professor	3	31
32	49	Female	Higher Education	Accountant	1	32
33	49	Male	Higher Education	Chef du cuisine	3	33
34	49	Female	Higher Education	Journalist	3	34
35	49	Male	Higher Education	Cook	3	35
36	49	Male	Higher Education	Manager	3	36
37	50	Female	Higher Education	Advertising Specialist	1	37
38	50	Female	Higher Education	Senior Communications Officer	2	38
39	50	Female	Higher Education	Professor	3	39
40	50	Female	Higher Education	Professor	2	40
41	50	Female	Secondary Education	Technical Assistant	2	41
42	50	Female	Higher Education	Psychologist	1	42
43	50	Female	Higher Education	Economist	2	43
44	51	Male	Higher Education	Designer	2	44
45	51	Male	Higher Education	Professor	3	45
46	51	Female	Higher Education	Professor	2	46
47	51	Female	Higher Education	Professor	1	47
48	52	Female	Higher Education	Social Assistant	1	48
49	52	Male	Higher Education	Lecturer	5	49
50	52	Male	Higher Education	Designer	3	50
51	52	Female	Higher Education	Psychologist	2	51
52	52	Male	Higher Education	Industrial Designer	1	52
53	52	Female	Higher Education	Professor	3	53
54	52	Male	Higher Education	Architect	2	54
55	52	Male	Higher Education	Professor	2	55
56	53	Female	Higher Education	Treasury Coordination	1	56
57	53	Female	Secondary Education	Administrative	1	57
58	53	Male	Higher Education	Lecturer	3	58
59	53	Female	Higher Education	Lawyer	2	59
60	53	Female	Higher Education	Treasury Coordination	1	60
61	53	Female	Higher Education	Lecturer	2	61
62	53	Female	Higher Education	Psychologist	2	62
63	53	Female	Higher Education	Professor	3	63
64	53	Male	Higher Education	Designer	2	64
65	53	Female	Secondary Education	Administrative Assistant	2	65
66	53	Female	Higher Education	Professor	2	66
67	53	Male	Higher Education	Hotel Director	4	67
68	54	Female	Higher Education	Bank employee	3	68
69	54	Male	Higher Education	Architect	1	69
70	54	Male	Secondary Education	Commercial	5	70
71	55	Female	Higher Education	Administrative Coordinator	1	71
72	55	Female	Higher Education	Administrative Coordinator	1	72
73	55	Male	Secondary Education	Bank employee	2	73
74	55	Female	Secondary Education	Clerk	1	74
75	55	Female	Primary and Lower Secondary Education	Administrative	2	75
76	55	Male	Higher Education	Professor	2	76
77	55	Male	Higher Education	Translator	4	77
78	56	Male	Higher Education	Professor	4	78
79	56	Male	Higher Education	Professor	3	79
80	56	Female	Higher Education	Librarian	1	80
81	57	Female	Secondary Education	Commercial Assistant	3	81
82	57	Female	Higher Education	Lecturer	2	82
83	57	Female	Higher Education	Early Childhood Educator	3	83
84	57	Male	Higher Education	Professor	2	84
85	57	Male	Higher Education	Professor	2	85
86	57	Female	Higher Education	Professor	2	86
87	58	Male	Higher Education	Lecturer	2	87
88	58	Male	Higher Education	Designer	1	88
89	58	Male	Higher Education	CEO	3	89
90	58	Male	Higher Education	Professor	3	90
91	59	Male	Higher Education	Professor	3	91
92	59	Female	Higher Education	Professor	2	92
93	59	Male	Higher Education	Professor	2	93
94	59	Female	Higher Education	Financial Advisor	1	94
95	59	Male	Higher Education	Architect	3	95
96	59	Female	Higher Education	Professor	2	96
97	59	Male	Higher Education	Civil Engineer	3	97
98	59	Male	Higher Education	Professor	2	98
99	59	Male	Higher Education	Administrator	4	99
99	60	Male	Higher Education	Businessman	4	100
100	60	Female	Secondary Education	Technical Assistant	1	101
101	60	Male	Higher Education	Architect	3	102
102	60	Male	Higher Education	Professor	1	103
103	60	Male	Higher Education	Designer	4	104
104	60	Female	Higher Education	Higher Technician	3	105
1	61	Male	Higher Education	Director	3	1
2	61	Male	Higher Education	Professor	2	2
3	61	Male	Higher Education	Lecturer	1	3
4	61	Male	Higher Education	Manager	3	4
5	61	Male	Secondary Education	Fashion Pattern Maker	3	5
6	61	Male	Higher Education	Professor	3	6
7	61	Male	Higher Education	Professor	1	7
8	62	Male	Higher Education	Lecturer	2	8
9	62	Female	Higher Education	Professor	3	9
10	62	Female	Secondary Education	Technical Assistant	1	10
11	63	Female	Secondary Education	Housekeeper	4	11
12	64	Male	Higher Education	Lecturer	3	12
13	64	Male	Higher Education	Lecturer	2	13
14	65	Male	Higher Education	Professor	1	14
15	66	Female	Higher Education	Professor	1	15
16	66	Female	Higher Education	Professor	1	16
17	66	Male	Higher Education	TV Operator	3	17
18	66	Female	Higher Education	?	2	18
19	67	Male	Higher Education	Professor	1	19
20	67	Female	Higher Education	Economist	1	20
21	68	Male	Higher Education	Medical Doctor	3	21
22	68	Male	Higher Education	Professor	2	22
23	69	Male	Higher Education	Medical Doctor	1	23
24	70	Male	Higher Education	Professor	2	24
25	70	Male	Higher Education	Architect	2	25
26	72	Male	Higher Education	Lecturer	2	26
27	74	Male	Higher Education	Sculptor	2	27
28	74	Male	Higher Education	Veterinarian	2	28
29	74	Male	Higher Education	Lecturer	1	29
30	90	Undefined	Secondary Education	Public servant	5	30
218					539
			Hunger		Sums						Percentages
					1	2	3	4	5	total						total
		30	Baby Boomers (1945-1960)	more than 60	10	10	8	1	1	30	33.3333	33.3333	26.6667	3.33333	3.33333	100
		105	Generation X (1960-1980)	44 to 60	22	37	32	9	4	104	21.1538	35.5769	30.7692	8.65385	3.84615	100
		35	Millennials (Y) (1980-1995)	29 to 43	5	10	12	7	1	35	14.2857	28.5714	34.2857	20	2.85714	100
		48	Generation Z (1995-2010)	13 to 28	3	17	17	10	1	48	6.25	35.4167	35.4167	20.8333	2.08333	100
		218
Average	2.46083
SD	1.02034

## Sheet: Poverty
	Question 1	Question 2	Question 3	Question 4	Question 8
1	17	Female	Secondary Education	———-	3	1
2	18	Female	Secondary Education	Student	2	2
3	18	Male	Higher Education	Student	3	3
4	18	Female	Higher Education	Student	1	4
5	18	Female	Secondary Education	Student	3	5
6	18	Female	Secondary Education	Student	3	6
7	19	Female	Higher Education	Student	2	7
8	19	Female	Secondary Education	Student	2	8
9	19	Female	Secondary Education	Student	2	9
10	19	Female	Secondary Education	Student	2	10
11	19	Female	Secondary Education	Student	2	11
12	20	Female	Secondary Education	Student	5	12
13	20	Female	Secondary Education	Student	4	13
14	20	Female	Primary and Lower Secondary Education	Student	1	14
15	20	Female	Secondary Education	Student	2	15
16	20	Male	Higher Education	Unemployed	3	16
17	20	Female	Higher Education	Student	1	17
18	20	Male	Secondary Education	Student	2	18
19	21	Female	Higher Education	Student	1	19
20	21	Female	Higher Education	Student	1	20
21	21	Female	Secondary Education	Student	3	21
22	21	Female	Higher Education	Student	1	22
23	21	Female	Higher Education	Student	3	23
24	21	Male	Secondary Education	Depositor	1	24
25	21	Female	Secondary Education	Student	2	25
26	22	Male	Secondary Education	Student	1	26
27	22	Female	Higher Education	Student	2	27
28	22	Male	Higher Education	Communication Designer	2	28
29	22	Female	Higher Education	Student	2	29
30	22	Female	Higher Education	Pastry Chef	2	30
31	22	Male	Higher Education	Student	3	31
32	22	Male	Higher Education	Food & Beverage	2	32
33	22	Male	Higher Education	Waiter	2	33
34	22	Female	Higher Education	Event Organizer	2	34
35	23	Female	Higher Education	Designer	2	35
36	23	Female	Higher Education	Communication Designer	3	36
37	23	Female	Higher Education	Bakery / Pastry	1	37
38	23	Female	Higher Education	Designer	2	38
39	23	Female	Higher Education	Student	1	39
40	23	Male	Higher Education	Student	2	40
41	23	Female	Higher Education	Student	1	41
42	23	Female	Higher Education	Student	1	42
43	24	Female	Secondary Education	Student	1	43
44	24	Female	Higher Education	Unemployed	1	44
45	25	Male	Higher Education	Medical Doctor	3	45
46	26	Female	Higher Education	Architect	2	46
47	28	Female	Higher Education	Secretariat.	1	47
48	28	Female	Higher Education	Researcher	1	48
1	29	Male	Higher Education	Chef de cuisine	2	1
2	29	Female	Higher Education	Communication Manager	3	2
3	29	Female	Higher Education	Musician	3	3
4	30	Male	Higher Education	Professor	1	4
5	30	Female	Primary and Lower Secondary Education	Designer	1	5
6	31	Female	Higher Education	Higher technical staff	3	6
7	31	Female	Higher Education	Interior Designer	1	7
8	32	Male	Higher Education	Professor	2	8
9	33	Female	Higher Education	Designer	2	9
10	33	Male	Higher Education	Strategist and Creative Director.	2	10
11	34	Male	Higher Education	Librarian	2	11
12	35	Female	Higher Education	Lecturer	1	12
13	35	Female	Higher Education	Researcher	3	13
14	36	Female	Higher Education	Graphic Designer	3	14
15	36	Female	Higher Education	Even Manager	1	15
16	36	Male	Higher Education	Engineer	2	16
17	36	Female	Higher Education	Graphic Designer	2	17
18	36	Male	Higher Education	Design Manager	2	18
19	38	Male	Higher Education	Engineer	2	19
20	38	Female	Higher Education	Nutritionist	2	20
21	39	Female	Secondary Education	Cashier	2	21
22	39	Female	Higher Education	Lecturer	1	22
23	40	Female	Higher Education	Marketing & Communication	1	23
24	40	Female	Higher Education	Professor	3	24
25	41	Male	Higher Education	Medical Doctor	2	25
26	41	Female	Higher Education	Illustrator	1	26
27	41	Male	Higher Education	Statistician	3	27
28	42	Female	Higher Education	Professor	1	28
29	42	Female	Higher Education	Cultural Management	2	29
30	42	Male	Higher Education	Manager	3	30
31	42	Male	Higher Education	Lecturer	2	31
32	42	Male	Secondary Education	Gas Network Installer	3	32
33	43	Male	Higher Education	Professor	3	33
34	43	Male	Higher Education	Professor	2	34
35	43	Male	Higher Education	Sommelier	3	35
1	44	Female	Higher Education	Administrative	2	1
2	44	Female	Higher Education	Professor	2	2
3	44	Female	Higher Education	Civil Engineer	2	3
4	44	Female	Higher Education	Professor	4	4
5	44	Male	Secondary Education	Chef de cuisine	2	5
6	45	Male	Higher Education	Commercial	3	6
7	45	Male	Higher Education	Lecturer	3	7
8	45	Female	Higher Education	Instructor	2	8
9	46	Female	Higher Education	Professor	2	9
10	46	Female	Higher Education	Public Relations and Communications Coordinator.	3	10
11	46	Female	Higher Education	Professor	1	11
12	46	Female	Higher Education	Local Accommodation Manager	2	12
13	47	Male	Higher Education	Engineer	2	13
14	47	Male	Higher Education	Professor	3	14
15	47	Male	Higher Education	Business Administrator.	2	15
16	47	Female	Higher Education	Food Engineer	4	16
17	47	Male	Higher Education	Lecturer	3	17
18	48	Male	Higher Education	Engineer	2	18
19	48	Female	Higher Education	Professor	2	19
20	48	Female	Higher Education	Researcher	1	20
21	48	Female	Higher Education	Professor	2	21
22	48	Female	Higher Education	Veterinarian	2	22
23	48	Female	Higher Education	Professor	2	23
24	48	Female	Higher Education	Early Childhood Educator.	1	24
25	48	Male	Higher Education	Lecturer	3	25
26	48	Female	Higher Education	Lecturer	2	26
27	48	Female	Higher Education	Lecturer	1	27
28	49	Female	Higher Education	Lecturer	2	28
29	49	Male	Higher Education	Professor	2	29
30	49	Male	Secondary Education	Accounting Technician	2	30
31	49	Female	Higher Education	Professor	2	31
32	49	Female	Higher Education	Accountant	1	32
33	49	Male	Higher Education	Chef du cuisine	2	33
34	49	Female	Higher Education	Journalist	2	34
35	49	Male	Higher Education	Cook	2	35
36	49	Male	Higher Education	Manager	4	36
37	50	Female	Higher Education	Advertising Specialist	5	37
38	50	Female	Higher Education	Senior Communications Officer	1	38
39	50	Female	Higher Education	Professor	2	39
40	50	Female	Higher Education	Professor	1	40
41	50	Female	Secondary Education	Technical Assistant	3	41
42	50	Female	Higher Education	Psychologist	3	42
43	50	Female	Higher Education	Economist	1	43
44	51	Male	Higher Education	Designer	1	44
45	51	Male	Higher Education	Professor	1	45
46	51	Female	Higher Education	Professor	3	46
47	51	Female	Higher Education	Professor	2	47
48	52	Female	Higher Education	Social Assistant	1	48
49	52	Male	Higher Education	Lecturer	2	49
50	52	Male	Higher Education	Designer	1	50
51	52	Female	Higher Education	Psychologist	2	51
52	52	Male	Higher Education	Industrial Designer	3	52
53	52	Female	Higher Education	Professor	1	53
54	52	Male	Higher Education	Architect	4	54
55	52	Male	Higher Education	Professor	2	55
56	53	Female	Higher Education	Treasury Coordination	5	56
57	53	Female	Secondary Education	Administrative	2	57
58	53	Male	Higher Education	Lecturer	2	58
59	53	Female	Higher Education	Lawyer	2	59
60	53	Female	Higher Education	Treasury Coordination	2	60
61	53	Female	Higher Education	Lecturer	2	61
62	53	Female	Higher Education	Psychologist	1	62
63	53	Female	Higher Education	Professor	1	63
64	53	Male	Higher Education	Designer	1	64
65	53	Female	Secondary Education	Administrative Assistant	1	65
66	53	Female	Higher Education	Professor	2	66
67	53	Male	Higher Education	Hotel Director	3	67
68	54	Female	Higher Education	Bank employee	1	68
69	54	Male	Higher Education	Architect	5	69
70	54	Male	Secondary Education	Commercial	2	70
71	55	Female	Higher Education	Administrative Coordinator	1	71
72	55	Female	Higher Education	Administrative Coordinator	1	72
73	55	Male	Secondary Education	Bank employee	3	73
74	55	Female	Secondary Education	Clerk	3	74
75	55	Female	Primary and Lower Secondary Education	Administrative	3	75
76	55	Male	Higher Education	Professor	2	76
77	55	Male	Higher Education	Translator	2	77
78	56	Male	Higher Education	Professor	3	78
79	56	Male	Higher Education	Professor	2	79
80	56	Female	Higher Education	Librarian	2	80
81	57	Female	Secondary Education	Commercial Assistant	2	81
82	57	Female	Higher Education	Lecturer	3	82
83	57	Female	Higher Education	Early Childhood Educator	2	83
84	57	Male	Higher Education	Professor	2	84
85	57	Male	Higher Education	Professor	2	85
86	57	Female	Higher Education	Professor	4	86
87	58	Male	Higher Education	Lecturer	1	87
88	58	Male	Higher Education	Designer	1	88
89	58	Male	Higher Education	CEO	4	89
90	58	Male	Higher Education	Professor	3	90
91	59	Male	Higher Education	Professor	4	91
92	59	Female	Higher Education	Professor	2	92
93	59	Male	Higher Education	Professor	4	93
94	59	Female	Higher Education	Financial Advisor	4	94
95	59	Male	Higher Education	Architect	3	95
96	59	Female	Higher Education	Professor	2	96
97	59	Male	Higher Education	Civil Engineer	2	97
98	59	Male	Higher Education	Professor	1	98
99	59	Male	Higher Education	Administrator	1	99
99	60	Male	Higher Education	Businessman	2	100
100	60	Female	Secondary Education	Technical Assistant	3	101
101	60	Male	Higher Education	Architect	2	102
102	60	Male	Higher Education	Professor	2	103
103	60	Male	Higher Education	Designer	1	104
104	60	Female	Higher Education	Higher Technician	4	105
1	61	Male	Higher Education	Director	2	1
2	61	Male	Higher Education	Professor	2	2
3	61	Male	Higher Education	Lecturer	3	3
4	61	Male	Higher Education	Manager	1	4
5	61	Male	Secondary Education	Fashion Pattern Maker	3	5
6	61	Male	Higher Education	Professor	2	6
7	61	Male	Higher Education	Professor	2	7
8	62	Male	Higher Education	Lecturer	4	8
9	62	Female	Higher Education	Professor	3	9
10	62	Female	Secondary Education	Technical Assistant	2	10
11	63	Female	Secondary Education	Housekeeper	1	11
12	64	Male	Higher Education	Lecturer	2	12
13	64	Male	Higher Education	Lecturer	2	13
14	65	Male	Higher Education	Professor	1	14
15	66	Female	Higher Education	Professor	3	15
16	66	Female	Higher Education	Professor	1	16
17	66	Male	Higher Education	TV Operator	3	17
18	66	Female	Higher Education	?	5	18
19	67	Male	Higher Education	Professor	3	19
20	67	Female	Higher Education	Economist	3	20
21	68	Male	Higher Education	Medical Doctor	2	21
22	68	Male	Higher Education	Professor	1	22
23	69	Male	Higher Education	Medical Doctor	2	23
24	70	Male	Higher Education	Professor	1	24
25	70	Male	Higher Education	Architect	2	25
26	72	Male	Higher Education	Lecturer	2	26
27	74	Male	Higher Education	Sculptor	2	27
28	74	Male	Higher Education	Veterinarian	1	28
29	74	Male	Higher Education	Lecturer	2	29
30	90	Undefined	Secondary Education	Public servant	2	30
218					465
			Poverty		Sums						Percentages
					1	2	3	4	5	total						total
		30	Baby Boomers (1945-1960)	more than 60	7	14	7	1	1	30	23.3333	46.6667	23.3333	3.33333	3.33333	100
		105	Generation X (1960-1980)	44 to 60	25	47	19	10	3	104	24.0385	45.1923	18.2692	9.61538	2.88462	100
		35	Millennials (Y) (1980-1995)	29 to 43	9	15	11	0	0	35	25.7143	42.8571	31.4286	0	0	100
		48	Generation Z (1995-2010)	13 to 28	16	20	10	1	1	48	33.3333	41.6667	20.8333	2.08333	2.08333	100
		218
Average	2.13303
SD	0.941262

## Sheet: War
	Question 1	Question 2	Question 3	Question 4	Question 9
1	17	Female	Secondary Education	———-	2	1
2	18	Female	Secondary Education	Student	2	2
3	18	Male	Higher Education	Student	1	3
4	18	Female	Higher Education	Student	1	4
5	18	Female	Secondary Education	Student	1	5
6	18	Female	Secondary Education	Student	3	6
7	19	Female	Higher Education	Student	2	7
8	19	Female	Secondary Education	Student	2	8
9	19	Female	Secondary Education	Student	1	9
10	19	Female	Secondary Education	Student	3	10
11	19	Female	Secondary Education	Student	2	11
12	20	Female	Secondary Education	Student	3	12
13	20	Female	Secondary Education	Student	4	13
14	20	Female	Primary and Lower Secondary Education	Student	1	14
15	20	Female	Secondary Education	Student	3	15
16	20	Male	Higher Education	Unemployed	4	16
17	20	Female	Higher Education	Student	3	17
18	20	Male	Secondary Education	Student	2	18
19	21	Female	Higher Education	Student	1	19
20	21	Female	Higher Education	Student	2	20
21	21	Female	Secondary Education	Student	3	21
22	21	Female	Higher Education	Student	2	22
23	21	Female	Higher Education	Student	4	23
24	21	Male	Secondary Education	Depositor	1	24
25	21	Female	Secondary Education	Student	3	25
26	22	Male	Secondary Education	Student	1	26
27	22	Female	Higher Education	Student	2	27
28	22	Male	Higher Education	Communication Designer	2	28
29	22	Female	Higher Education	Student	1	29
30	22	Female	Higher Education	Pastry Chef	2	30
31	22	Male	Higher Education	Student	1	31
32	22	Male	Higher Education	Food & Beverage	1	32
33	22	Male	Higher Education	Waiter	1	33
34	22	Female	Higher Education	Event Organizer	1	34
35	23	Female	Higher Education	Designer	2	35
36	23	Female	Higher Education	Communication Designer	1	36
37	23	Female	Higher Education	Bakery / Pastry	1	37
38	23	Female	Higher Education	Designer	3	38
39	23	Female	Higher Education	Student	2	39
40	23	Male	Higher Education	Student	2	40
41	23	Female	Higher Education	Student	2	41
42	23	Female	Higher Education	Student	1	42
43	24	Female	Secondary Education	Student	1	43
44	24	Female	Higher Education	Unemployed	1	44
45	25	Male	Higher Education	Medical Doctor	3	45
46	26	Female	Higher Education	Architect	2	46
47	28	Female	Higher Education	Secretariat.	1	47
48	28	Female	Higher Education	Researcher	2	48
49	29	Male	Higher Education	Chef de cuisine	2	1
50	29	Female	Higher Education	Communication Manager	3	2
51	29	Female	Higher Education	Musician	2	3
52	30	Male	Higher Education	Professor	1	4
53	30	Female	Primary and Lower Secondary Education	Designer	2	5
54	31	Female	Higher Education	Higher technical staff	1	6
55	31	Female	Higher Education	Interior Designer	1	7
56	32	Male	Higher Education	Professor	3	8
57	33	Female	Higher Education	Designer	3	9
58	33	Male	Higher Education	Strategist and Creative Director.	3	10
59	34	Male	Higher Education	Librarian	2	11
60	35	Female	Higher Education	Lecturer	1	12
61	35	Female	Higher Education	Researcher	4	13
62	36	Female	Higher Education	Graphic Designer	3	14
63	36	Female	Higher Education	Even Manager	2	15
64	36	Male	Higher Education	Engineer	2	16
65	36	Female	Higher Education	Graphic Designer	1	17
66	36	Male	Higher Education	Design Manager	3	18
67	38	Male	Higher Education	Engineer	2	19
68	38	Female	Higher Education	Nutritionist	2	20
69	39	Female	Secondary Education	Cashier	3	21
70	39	Female	Higher Education	Lecturer	1	22
71	40	Female	Higher Education	Marketing & Communication	1	23
72	40	Female	Higher Education	Professor	3	24
73	41	Male	Higher Education	Medical Doctor	4	25
74	41	Female	Higher Education	Illustrator	1	26
75	41	Male	Higher Education	Statistician	3	27
76	42	Female	Higher Education	Professor	1	28
77	42	Female	Higher Education	Cultural Management	2	29
78	42	Male	Higher Education	Manager	5	30
79	42	Male	Higher Education	Lecturer	2	31
80	42	Male	Secondary Education	Gas Network Installer	3	32
81	43	Male	Higher Education	Professor	3	33
82	43	Male	Higher Education	Professor	1	34
83	43	Male	Higher Education	Sommelier	2	35
84	44	Female	Higher Education	Administrative	2	1
85	44	Female	Higher Education	Professor	2	2
86	44	Female	Higher Education	Civil Engineer	1	3
87	44	Female	Higher Education	Professor	3	4
88	44	Male	Secondary Education	Chef de cuisine	1	5
89	45	Male	Higher Education	Commercial	2	6
90	45	Male	Higher Education	Lecturer	2	7
91	45	Female	Higher Education	Instructor	2	8
92	46	Female	Higher Education	Professor	3	9
93	46	Female	Higher Education	Public Relations and Communications Coordinator.	2	10
94	46	Female	Higher Education	Professor	1	11
95	46	Female	Higher Education	Local Accommodation Manager	4	12
96	47	Male	Higher Education	Engineer	3	13
97	47	Male	Higher Education	Professor	4	14
98	47	Male	Higher Education	Business Administrator.	2	15
99	47	Female	Higher Education	Food Engineer	2	16
100	47	Male	Higher Education	Lecturer	2	17
101	48	Male	Higher Education	Engineer	4	18
102	48	Female	Higher Education	Professor	3	19
103	48	Female	Higher Education	Researcher	1	20
104	48	Female	Higher Education	Professor	1	21
105	48	Female	Higher Education	Veterinarian	2	22
106	48	Female	Higher Education	Professor	1	23
107	48	Female	Higher Education	Early Childhood Educator.	1	24
108	48	Male	Higher Education	Lecturer	2	25
109	48	Female	Higher Education	Lecturer	1	26
110	48	Female	Higher Education	Lecturer	1	27
111	49	Female	Higher Education	Lecturer	2	28
112	49	Male	Higher Education	Professor	2	29
113	49	Male	Secondary Education	Accounting Technician	3	30
114	49	Female	Higher Education	Professor	1	31
115	49	Female	Higher Education	Accountant	1	32
116	49	Male	Higher Education	Chef du cuisine	1	33
117	49	Female	Higher Education	Journalist	3	34
118	49	Male	Higher Education	Cook	2	35
119	49	Male	Higher Education	Manager	3	36
120	50	Female	Higher Education	Advertising Specialist	5	37
121	50	Female	Higher Education	Senior Communications Officer	1	38
122	50	Female	Higher Education	Professor	2	39
123	50	Female	Higher Education	Professor	2	40
124	50	Female	Secondary Education	Technical Assistant	1	41
125	50	Female	Higher Education	Psychologist	2	42
126	50	Female	Higher Education	Economist	1	43
127	51	Male	Higher Education	Designer	1	44
128	51	Male	Higher Education	Professor	3	45
129	51	Female	Higher Education	Professor	3	46
130	51	Female	Higher Education	Professor	1	47
131	52	Female	Higher Education	Social Assistant	2	48
132	52	Male	Higher Education	Lecturer	2	49
133	52	Male	Higher Education	Designer	2	50
134	52	Female	Higher Education	Psychologist	2	51
135	52	Male	Higher Education	Industrial Designer	2	52
136	52	Female	Higher Education	Professor	1	53
137	52	Male	Higher Education	Architect	4	54
138	52	Male	Higher Education	Professor	1	55
139	53	Female	Higher Education	Treasury Coordination	4	56
140	53	Female	Secondary Education	Administrative	2	57
141	53	Male	Higher Education	Lecturer	1	58
142	53	Female	Higher Education	Lawyer	1	59
143	53	Female	Higher Education	Treasury Coordination	2	60
144	53	Female	Higher Education	Lecturer	2	61
145	53	Female	Higher Education	Psychologist	2	62
146	53	Female	Higher Education	Professor	1	63
147	53	Male	Higher Education	Designer	1	64
148	53	Female	Secondary Education	Administrative Assistant	3	65
149	53	Female	Higher Education	Professor	2	66
150	53	Male	Higher Education	Hotel Director	2	67
151	54	Female	Higher Education	Bank employee	3	68
152	54	Male	Higher Education	Architect	5	69
153	54	Male	Secondary Education	Commercial	1	70
154	55	Female	Higher Education	Administrative Coordinator	1	71
155	55	Female	Higher Education	Administrative Coordinator	1	72
156	55	Male	Secondary Education	Bank employee	2	73
157	55	Female	Secondary Education	Clerk	2	74
158	55	Female	Primary and Lower Secondary Education	Administrative	2	75
159	55	Male	Higher Education	Professor	1	76
160	55	Male	Higher Education	Translator	2	77
161	56	Male	Higher Education	Professor	4	78
162	56	Male	Higher Education	Professor	2	79
163	56	Female	Higher Education	Librarian	3	80
164	57	Female	Secondary Education	Commercial Assistant	1	81
165	57	Female	Higher Education	Lecturer	3	82
166	57	Female	Higher Education	Early Childhood Educator	4	83
167	57	Male	Higher Education	Professor	4	84
168	57	Male	Higher Education	Professor	2	85
169	57	Female	Higher Education	Professor	4	86
170	58	Male	Higher Education	Lecturer	1	87
171	58	Male	Higher Education	Designer	1	88
172	58	Male	Higher Education	CEO	2	89
173	58	Male	Higher Education	Professor	3	90
174	59	Male	Higher Education	Professor	3	91
175	59	Female	Higher Education	Professor	1	92
176	59	Male	Higher Education	Professor	4	93
177	59	Female	Higher Education	Financial Advisor	2	94
178	59	Male	Higher Education	Architect	2	95
179	59	Female	Higher Education	Professor	2	96
180	59	Male	Higher Education	Civil Engineer	1	97
181	59	Male	Higher Education	Professor	1	98
182	59	Male	Higher Education	Administrator	2	99
182	60	Male	Higher Education	Businessman	2	100
183	60	Female	Secondary Education	Technical Assistant	2	101
184	60	Male	Higher Education	Architect	1	102
185	60	Male	Higher Education	Professor	2	103
186	60	Male	Higher Education	Designer	3	104
187	60	Female	Higher Education	Higher Technician	3	105
1	61	Male	Higher Education	Director	2	1
2	61	Male	Higher Education	Professor	2	2
3	61	Male	Higher Education	Lecturer	3	3
4	61	Male	Higher Education	Manager	1	4
5	61	Male	Secondary Education	Fashion Pattern Maker	3	5
6	61	Male	Higher Education	Professor	3	6
7	61	Male	Higher Education	Professor	2	7
8	62	Male	Higher Education	Lecturer	3	8
9	62	Female	Higher Education	Professor	2	9
10	62	Female	Secondary Education	Technical Assistant	2	10
11	63	Female	Secondary Education	Housekeeper	2	11
12	64	Male	Higher Education	Lecturer	4	12
13	64	Male	Higher Education	Lecturer	2	13
14	65	Male	Higher Education	Professor	1	14
15	66	Female	Higher Education	Professor	3	15
16	66	Female	Higher Education	Professor	2	16
17	66	Male	Higher Education	TV Operator	4	17
18	66	Female	Higher Education	?	3	18
19	67	Male	Higher Education	Professor	2	19
20	67	Female	Higher Education	Economist	3	20
21	68	Male	Higher Education	Medical Doctor	2	21
22	68	Male	Higher Education	Professor	1	22
23	69	Male	Higher Education	Medical Doctor	2	23
24	70	Male	Higher Education	Professor	1	24
25	70	Male	Higher Education	Architect	2	25
26	72	Male	Higher Education	Lecturer	4	26
27	74	Male	Higher Education	Sculptor	2	27
28	74	Male	Higher Education	Veterinarian	1	28
29	74	Male	Higher Education	Lecturer	2	29
30	90	Undefined	Secondary Education	Public servant	2	30
218					457
			War		Sum						Percentages
					1	2	3	4	5	total						total
		30	Baby Boomers (1945-1960)	more than 60	5	15	7	3	0	30	16.6667	50	23.3333	10	0	100
		105	Generation X (1960-1980)	44 to 60	34	42	17	10	2	105	32.381	40	16.1905	9.52381	1.90476	100
		35	Millennials (Y) (1980-1995)	29 to 43	10	11	11	2	1	35	28.5714	31.4286	31.4286	5.71429	2.85714	100
		48	Generation Z (1995-2010)	13 to 28	19	17	9	3	0	48	39.5833	35.4167	18.75	6.25	0	100
		218
Average	2.09633
SD	0.979087

## Sheet: Future food
	Question 1	Question 2	Question 3	Question 4	Question 10
1	17	Female	Secondary Education	———-	3	1
2	18	Female	Secondary Education	Student	2	2
3	18	Male	Higher Education	Student	4	3
4	18	Female	Higher Education	Student	1	4
5	18	Female	Secondary Education	Student	3	5
6	18	Female	Secondary Education	Student	3	6
7	19	Female	Higher Education	Student	3	7
8	19	Female	Secondary Education	Student	3	8
9	19	Female	Secondary Education	Student	2	9
10	19	Female	Secondary Education	Student	3	10
11	19	Female	Secondary Education	Student	1	11
12	20	Female	Secondary Education	Student	4	12
13	20	Female	Secondary Education	Student	3	13
14	20	Female	Primary and Lower Secondary Education	Student	2	14
15	20	Female	Secondary Education	Student	2	15
16	20	Male	Higher Education	Unemployed	5	16
17	20	Female	Higher Education	Student	2	17
18	20	Male	Secondary Education	Student	2	18
19	21	Female	Higher Education	Student	1	19
20	21	Female	Higher Education	Student	2	20
21	21	Female	Secondary Education	Student	5	21
22	21	Female	Higher Education	Student	2	22
23	21	Female	Higher Education	Student	4	23
24	21	Male	Secondary Education	Depositor	1	24
25	21	Female	Secondary Education	Student	2	25
26	22	Male	Secondary Education	Student	1	26
27	22	Female	Higher Education	Student	4	27
28	22	Male	Higher Education	Communication Designer	3	28
29	22	Female	Higher Education	Student	2	29
30	22	Female	Higher Education	Pastry Chef	1	30
31	22	Male	Higher Education	Student	4	31
32	22	Male	Higher Education	Food & Beverage	1	32
33	22	Male	Higher Education	Waiter	1	33
34	22	Female	Higher Education	Event Organizer	2	34
35	23	Female	Higher Education	Designer	2	35
36	23	Female	Higher Education	Communication Designer	3	36
37	23	Female	Higher Education	Bakery / Pastry	2	37
38	23	Female	Higher Education	Designer	4	38
39	23	Female	Higher Education	Student	3	39
40	23	Male	Higher Education	Student	1	40
41	23	Female	Higher Education	Student	1	41
42	23	Female	Higher Education	Student	1	42
43	24	Female	Secondary Education	Student	1	43
44	24	Female	Higher Education	Unemployed	3	44
45	25	Male	Higher Education	Medical Doctor	3	45
46	26	Female	Higher Education	Architect	3	46
47	28	Female	Higher Education	Secretariat.	2	47
48	28	Female	Higher Education	Researcher	3	48
49	29	Male	Higher Education	Chef de cuisine	2	1
50	29	Female	Higher Education	Communication Manager	3	2
51	29	Female	Higher Education	Musician	3	3
52	30	Male	Higher Education	Professor	1	4
53	30	Female	Primary and Lower Secondary Education	Designer	2	5
54	31	Female	Higher Education	Higher technical staff	3	6
55	31	Female	Higher Education	Interior Designer	2	7
56	32	Male	Higher Education	Professor	1	8
57	33	Female	Higher Education	Designer	2	9
58	33	Male	Higher Education	Strategist and Creative Director.	2	10
59	34	Male	Higher Education	Librarian	2	11
60	35	Female	Higher Education	Lecturer	1	12
61	35	Female	Higher Education	Researcher	3	13
62	36	Female	Higher Education	Graphic Designer	2	14
63	36	Female	Higher Education	Even Manager	2	15
64	36	Male	Higher Education	Engineer	3	16
65	36	Female	Higher Education	Graphic Designer	2	17
66	36	Male	Higher Education	Design Manager	2	18
67	38	Male	Higher Education	Engineer	2	19
68	38	Female	Higher Education	Nutritionist	1	20
69	39	Female	Secondary Education	Cashier	2	21
70	39	Female	Higher Education	Lecturer	2	22
71	40	Female	Higher Education	Marketing & Communication	1	23
72	40	Female	Higher Education	Professor	2	24
73	41	Male	Higher Education	Medical Doctor	3	25
74	41	Female	Higher Education	Illustrator	1	26
75	41	Male	Higher Education	Statistician	2	27
76	42	Female	Higher Education	Professor	2	28
77	42	Female	Higher Education	Cultural Management	2	29
78	42	Male	Higher Education	Manager	5	30
79	42	Male	Higher Education	Lecturer	2	31
80	42	Male	Secondary Education	Gas Network Installer	5	32
81	43	Male	Higher Education	Professor	3	33
82	43	Male	Higher Education	Professor	2	34
83	43	Male	Higher Education	Sommelier	3	35
84	44	Female	Higher Education	Administrative	5	1
85	44	Female	Higher Education	Professor	2	2
86	44	Female	Higher Education	Civil Engineer	2	3
87	44	Female	Higher Education	Professor	2	4
88	44	Male	Secondary Education	Chef de cuisine	2	5
89	45	Male	Higher Education	Commercial	4	6
90	45	Male	Higher Education	Lecturer	2	7
91	45	Female	Higher Education	Instructor	4	8
92	46	Female	Higher Education	Professor	1	9
93	46	Female	Higher Education	Public Relations and Communications Coordinator.	3	10
94	46	Female	Higher Education	Professor	1	11
95	46	Female	Higher Education	Local Accommodation Manager	3	12
96	47	Male	Higher Education	Engineer	3	13
97	47	Male	Higher Education	Professor	2	14
98	47	Male	Higher Education	Business Administrator.	3	15
99	47	Female	Higher Education	Food Engineer	3	16
100	47	Male	Higher Education	Lecturer	3	17
101	48	Male	Higher Education	Engineer	1	18
102	48	Female	Higher Education	Professor	2	19
103	48	Female	Higher Education	Researcher	1	20
104	48	Female	Higher Education	Professor	3	21
105	48	Female	Higher Education	Veterinarian	2	22
106	48	Female	Higher Education	Professor	1	23
107	48	Female	Higher Education	Early Childhood Educator.	1	24
108	48	Male	Higher Education	Lecturer	4	25
109	48	Female	Higher Education	Lecturer	2	26
110	48	Female	Higher Education	Lecturer	3	27
111	49	Female	Higher Education	Lecturer	3	28
112	49	Male	Higher Education	Professor	2	29
113	49	Male	Secondary Education	Accounting Technician	4	30
114	49	Female	Higher Education	Professor	1	31
115	49	Female	Higher Education	Accountant	1	32
116	49	Male	Higher Education	Chef du cuisine	3	33
117	49	Female	Higher Education	Journalist	4	34
118	49	Male	Higher Education	Cook	1	35
119	49	Male	Higher Education	Manager	3	36
120	50	Female	Higher Education	Advertising Specialist	5	37
121	50	Female	Higher Education	Senior Communications Officer	2	38
122	50	Female	Higher Education	Professor	2	39
123	50	Female	Higher Education	Professor	2	40
124	50	Female	Secondary Education	Technical Assistant	2	41
125	50	Female	Higher Education	Psychologist	3	42
126	50	Female	Higher Education	Economist	1	43
127	51	Male	Higher Education	Designer	1	44
128	51	Male	Higher Education	Professor	2	45
129	51	Female	Higher Education	Professor	2	46
130	51	Female	Higher Education	Professor	3	47
131	52	Female	Higher Education	Social Assistant	1	48
132	52	Male	Higher Education	Lecturer	2	49
133	52	Male	Higher Education	Designer	3	50
134	52	Female	Higher Education	Psychologist	1	51
135	52	Male	Higher Education	Industrial Designer	2	52
136	52	Female	Higher Education	Professor	1	53
137	52	Male	Higher Education	Architect	3	54
138	52	Male	Higher Education	Professor	2	55
139	53	Female	Higher Education	Treasury Coordination	4	56
140	53	Female	Secondary Education	Administrative	2	57
141	53	Male	Higher Education	Lecturer	3	58
142	53	Female	Higher Education	Lawyer	2	59
143	53	Female	Higher Education	Treasury Coordination	1	60
144	53	Female	Higher Education	Lecturer	1	61
145	53	Female	Higher Education	Psychologist	3	62
146	53	Female	Higher Education	Professor	3	63
147	53	Male	Higher Education	Designer	1	64
148	53	Female	Secondary Education	Administrative Assistant	3	65
149	53	Female	Higher Education	Professor	1	66
150	53	Male	Higher Education	Hotel Director	2	67
151	54	Female	Higher Education	Bank employee	2	68
152	54	Male	Higher Education	Architect	5	69
153	54	Male	Secondary Education	Commercial	2	70
154	55	Female	Higher Education	Administrative Coordinator	1	71
155	55	Female	Higher Education	Administrative Coordinator	2	72
156	55	Male	Secondary Education	Bank employee	2	73
157	55	Female	Secondary Education	Clerk	3	74
158	55	Female	Primary and Lower Secondary Education	Administrative	3	75
159	55	Male	Higher Education	Professor	2	76
160	55	Male	Higher Education	Translator	2	77
161	56	Male	Higher Education	Professor	1	78
162	56	Male	Higher Education	Professor	3	79
163	56	Female	Higher Education	Librarian	3	80
164	57	Female	Secondary Education	Commercial Assistant	1	81
165	57	Female	Higher Education	Lecturer	2	82
166	57	Female	Higher Education	Early Childhood Educator	3	83
167	57	Male	Higher Education	Professor	1	84
168	57	Male	Higher Education	Professor	4	85
169	57	Female	Higher Education	Professor	1	86
170	58	Male	Higher Education	Lecturer	1	87
171	58	Male	Higher Education	Designer	1	88
172	58	Male	Higher Education	CEO	3	89
173	58	Male	Higher Education	Professor	3	90
174	59	Male	Higher Education	Professor	5	91
175	59	Female	Higher Education	Professor	2	92
176	59	Male	Higher Education	Professor	4	93
177	59	Female	Higher Education	Financial Advisor	4	94
178	59	Male	Higher Education	Architect	3	95
179	59	Female	Higher Education	Professor	2	96
180	59	Male	Higher Education	Civil Engineer	1	97
181	59	Male	Higher Education	Professor	2	98
182	59	Male	Higher Education	Administrator	1	99
182	60	Male	Higher Education	Businessman	4	100
183	60	Female	Secondary Education	Technical Assistant	3	101
184	60	Male	Higher Education	Architect	1	102
185	60	Male	Higher Education	Professor	2	103
186	60	Male	Higher Education	Designer	5	104
187	60	Female	Higher Education	Higher Technician	2	105
188	61	Male	Higher Education	Director	2	1
189	61	Male	Higher Education	Professor	3	2
190	61	Male	Higher Education	Lecturer	3	3
191	61	Male	Higher Education	Manager	1	4
192	61	Male	Secondary Education	Fashion Pattern Maker	4	5
193	61	Male	Higher Education	Professor	2	6
194	61	Male	Higher Education	Professor	2	7
195	62	Male	Higher Education	Lecturer	2	8
196	62	Female	Higher Education	Professor	1	9
197	62	Female	Secondary Education	Technical Assistant	2	10
198	63	Female	Secondary Education	Housekeeper	3	11
199	64	Male	Higher Education	Lecturer	1	12
200	64	Male	Higher Education	Lecturer	2	13
201	65	Male	Higher Education	Professor	1	14
202	66	Female	Higher Education	Professor	4	15
203	66	Female	Higher Education	Professor	2	16
204	66	Male	Higher Education	TV Operator	3	17
205	66	Female	Higher Education	?	5	18
206	67	Male	Higher Education	Professor	1	19
207	67	Female	Higher Education	Economist	3	20
208	68	Male	Higher Education	Medical Doctor	3	21
209	68	Male	Higher Education	Professor	1	22
210	69	Male	Higher Education	Medical Doctor	4	23
211	70	Male	Higher Education	Professor	2	24
212	70	Male	Higher Education	Architect	3	25
213	72	Male	Higher Education	Lecturer	2	26
214	74	Male	Higher Education	Sculptor	3	27
215	74	Male	Higher Education	Veterinarian	1	28
216	74	Male	Higher Education	Lecturer	3	29
217	90	Undefined	Secondary Education	Public servant	4	30
218					512
			Future food		Sum						Percentages
					1	2	3	4	5	total						total
		30	Baby Boomers (1945-1960)	more than 60	7	9	9	3	2	30	23.3333	30	30	10	6.66667	100
		105	Generation X (1960-1980)	44 to 60	28	33	28	10	5	104	26.9231	31.7308	26.9231	9.61538	4.80769	100
		35	Millennials (Y) (1980-1995)	29 to 43	6	19	8	0	2	35	17.1429	54.2857	22.8571	0	5.71429	100
		48	Generation Z (1995-2010)	13 to 28	12	14	14	6	2	48	25	29.1667	29.1667	12.5	4.16667	100
		218
Average	2.34562
SD	1.08419

## Sheet: Pollution
	Question 1	Question 2	Question 3	Question 4	Question 11
1	17	Female	Secondary Education	———-	2	1
2	18	Female	Secondary Education	Student	2	2
3	18	Male	Higher Education	Student	4	3
4	18	Female	Higher Education	Student	1	4
5	18	Female	Secondary Education	Student	1	5
6	18	Female	Secondary Education	Student	4	6
7	19	Female	Higher Education	Student	2	7
8	19	Female	Secondary Education	Student	2	8
9	19	Female	Secondary Education	Student	2	9
10	19	Female	Secondary Education	Student	3	10
11	19	Female	Secondary Education	Student	1	11
12	20	Female	Secondary Education	Student	3	12
13	20	Female	Secondary Education	Student	3	13
14	20	Female	Primary and Lower Secondary Education	Student	2	14
15	20	Female	Secondary Education	Student	1	15
16	20	Male	Higher Education	Unemployed	4	16
17	20	Female	Higher Education	Student	2	17
18	20	Male	Secondary Education	Student	2	18
19	21	Female	Higher Education	Student	1	19
20	21	Female	Higher Education	Student	2	20
21	21	Female	Secondary Education	Student	5	21
22	21	Female	Higher Education	Student	3	22
23	21	Female	Higher Education	Student	3	23
24	21	Male	Secondary Education	Depositor	1	24
25	21	Female	Secondary Education	Student	3	25
26	22	Male	Secondary Education	Student	2	26
27	22	Female	Higher Education	Student	3	27
28	22	Male	Higher Education	Communication Designer	2	28
29	22	Female	Higher Education	Student	2	29
30	22	Female	Higher Education	Pastry Chef	2	30
31	22	Male	Higher Education	Student	3	31
32	22	Male	Higher Education	Food & Beverage	1	32
33	22	Male	Higher Education	Waiter	1	33
34	22	Female	Higher Education	Event Organizer	2	34
35	23	Female	Higher Education	Designer	2	35
36	23	Female	Higher Education	Communication Designer	2	36
37	23	Female	Higher Education	Bakery / Pastry	2	37
38	23	Female	Higher Education	Designer	5	38
39	23	Female	Higher Education	Student	2	39
40	23	Male	Higher Education	Student	2	40
41	23	Female	Higher Education	Student	1	41
42	23	Female	Higher Education	Student	1	42
43	24	Female	Secondary Education	Student	1	43
44	24	Female	Higher Education	Unemployed	2	44
45	25	Male	Higher Education	Medical Doctor	4	45
46	26	Female	Higher Education	Architect	3	46
47	28	Female	Higher Education	Secretariat.	2	47
48	28	Female	Higher Education	Researcher	3	48
49	29	Male	Higher Education	Chef de cuisine	2	1
50	29	Female	Higher Education	Communication Manager	3	2
51	29	Female	Higher Education	Musician	2	3
52	30	Male	Higher Education	Professor	1	4
53	30	Female	Primary and Lower Secondary Education	Designer	2	5
54	31	Female	Higher Education	Higher technical staff	1	6
55	31	Female	Higher Education	Interior Designer	1	7
56	32	Male	Higher Education	Professor	4	8
57	33	Female	Higher Education	Designer	1	9
58	33	Male	Higher Education	Strategist and Creative Director.	2	10
59	34	Male	Higher Education	Librarian	2	11
60	35	Female	Higher Education	Lecturer	2	12
61	35	Female	Higher Education	Researcher	4	13
62	36	Female	Higher Education	Graphic Designer	4	14
63	36	Female	Higher Education	Even Manager	2	15
64	36	Male	Higher Education	Engineer	2	16
65	36	Female	Higher Education	Graphic Designer	2	17
66	36	Male	Higher Education	Design Manager	2	18
67	38	Male	Higher Education	Engineer	2	19
68	38	Female	Higher Education	Nutritionist	2	20
69	39	Female	Secondary Education	Cashier	3	21
70	39	Female	Higher Education	Lecturer	1	22
71	40	Female	Higher Education	Marketing & Communication	1	23
72	40	Female	Higher Education	Professor	2	24
73	41	Male	Higher Education	Medical Doctor	2	25
74	41	Female	Higher Education	Illustrator	1	26
75	41	Male	Higher Education	Statistician	2	27
76	42	Female	Higher Education	Professor	2	28
77	42	Female	Higher Education	Cultural Management	1	29
78	42	Male	Higher Education	Manager	4	30
79	42	Male	Higher Education	Lecturer	2	31
80	42	Male	Secondary Education	Gas Network Installer	4	32
81	43	Male	Higher Education	Professor	3	33
82	43	Male	Higher Education	Professor	1	34
83	43	Male	Higher Education	Sommelier	3	35
84	44	Female	Higher Education	Administrative	2	1
85	44	Female	Higher Education	Professor	2	2
86	44	Female	Higher Education	Civil Engineer	1	3
87	44	Female	Higher Education	Professor	2	4
88	44	Male	Secondary Education	Chef de cuisine	2	5
89	45	Male	Higher Education	Commercial	3	6
90	45	Male	Higher Education	Lecturer	2	7
91	45	Female	Higher Education	Instructor	3	8
92	46	Female	Higher Education	Professor	2	9
93	46	Female	Higher Education	Public Relations and Communications Coordinator.	2	10
94	46	Female	Higher Education	Professor	1	11
95	46	Female	Higher Education	Local Accommodation Manager	2	12
96	47	Male	Higher Education	Engineer	3	13
97	47	Male	Higher Education	Professor	1	14
98	47	Male	Higher Education	Business Administrator.	1	15
99	47	Female	Higher Education	Food Engineer	1	16
100	47	Male	Higher Education	Lecturer	3	17
101	48	Male	Higher Education	Engineer	4	18
102	48	Female	Higher Education	Professor	2	19
103	48	Female	Higher Education	Researcher	1	20
104	48	Female	Higher Education	Professor	2	21
105	48	Female	Higher Education	Veterinarian	1	22
106	48	Female	Higher Education	Professor	1	23
107	48	Female	Higher Education	Early Childhood Educator.	2	24
108	48	Male	Higher Education	Lecturer	3	25
109	48	Female	Higher Education	Lecturer	1	26
110	48	Female	Higher Education	Lecturer	2	27
111	49	Female	Higher Education	Lecturer	2	28
112	49	Male	Higher Education	Professor	2	29
113	49	Male	Secondary Education	Accounting Technician	3	30
114	49	Female	Higher Education	Professor	1	31
115	49	Female	Higher Education	Accountant	1	32
116	49	Male	Higher Education	Chef du cuisine	2	33
117	49	Female	Higher Education	Journalist	1	34
118	49	Male	Higher Education	Cook	2	35
119	49	Male	Higher Education	Manager	4	36
120	50	Female	Higher Education	Advertising Specialist	5	37
121	50	Female	Higher Education	Senior Communications Officer	1	38
122	50	Female	Higher Education	Professor	2	39
123	50	Female	Higher Education	Professor	1	40
124	50	Female	Secondary Education	Technical Assistant	1	41
125	50	Female	Higher Education	Psychologist	2	42
126	50	Female	Higher Education	Economist	1	43
127	51	Male	Higher Education	Designer	1	44
128	51	Male	Higher Education	Professor	2	45
129	51	Female	Higher Education	Professor	3	46
130	51	Female	Higher Education	Professor	2	47
131	52	Female	Higher Education	Social Assistant	2	48
132	52	Male	Higher Education	Lecturer	2	49
133	52	Male	Higher Education	Designer	2	50
134	52	Female	Higher Education	Psychologist	3	51
135	52	Male	Higher Education	Industrial Designer	3	52
136	52	Female	Higher Education	Professor	1	53
137	52	Male	Higher Education	Architect	3	54
138	52	Male	Higher Education	Professor	2	55
139	53	Female	Higher Education	Treasury Coordination	3	56
140	53	Female	Secondary Education	Administrative	1	57
141	53	Male	Higher Education	Lecturer	2	58
142	53	Female	Higher Education	Lawyer	1	59
143	53	Female	Higher Education	Treasury Coordination	2	60
144	53	Female	Higher Education	Lecturer	1	61
145	53	Female	Higher Education	Psychologist	2	62
146	53	Female	Higher Education	Professor	1	63
147	53	Male	Higher Education	Designer	1	64
148	53	Female	Secondary Education	Administrative Assistant	1	65
149	53	Female	Higher Education	Professor	1	66
150	53	Male	Higher Education	Hotel Director	1	67
151	54	Female	Higher Education	Bank employee	1	68
152	54	Male	Higher Education	Architect	5	69
153	54	Male	Secondary Education	Commercial	2	70
154	55	Female	Higher Education	Administrative Coordinator	1	71
155	55	Female	Higher Education	Administrative Coordinator	1	72
156	55	Male	Secondary Education	Bank employee	2	73
157	55	Female	Secondary Education	Clerk	3	74
158	55	Female	Primary and Lower Secondary Education	Administrative	3	75
159	55	Male	Higher Education	Professor	2	76
160	55	Male	Higher Education	Translator	2	77
161	56	Male	Higher Education	Professor	1	78
162	56	Male	Higher Education	Professor	2	79
163	56	Female	Higher Education	Librarian	2	80
164	57	Female	Secondary Education	Commercial Assistant	1	81
165	57	Female	Higher Education	Lecturer	2	82
166	57	Female	Higher Education	Early Childhood Educator	2	83
167	57	Male	Higher Education	Professor	2	84
168	57	Male	Higher Education	Professor	2	85
169	57	Female	Higher Education	Professor	3	86
170	58	Male	Higher Education	Lecturer	1	87
171	58	Male	Higher Education	Designer	2	88
172	58	Male	Higher Education	CEO	5	89
173	58	Male	Higher Education	Professor	2	90
174	59	Male	Higher Education	Professor	3	91
175	59	Female	Higher Education	Professor	2	92
176	59	Male	Higher Education	Professor	4	93
177	59	Female	Higher Education	Financial Advisor	4	94
178	59	Male	Higher Education	Architect	3	95
179	59	Female	Higher Education	Professor	2	96
180	59	Male	Higher Education	Civil Engineer	1	97
181	59	Male	Higher Education	Professor	1	98
182	59	Male	Higher Education	Administrator	1	99
182	60	Male	Higher Education	Businessman	2	100
183	60	Female	Secondary Education	Technical Assistant	2	101
184	60	Male	Higher Education	Architect	2	102
185	60	Male	Higher Education	Professor	2	103
186	60	Male	Higher Education	Designer	2	104
187	60	Female	Higher Education	Higher Technician	2	105
188	61	Male	Higher Education	Director	2	1
189	61	Male	Higher Education	Professor	2	2
190	61	Male	Higher Education	Lecturer	4	3
191	61	Male	Higher Education	Manager	1	4
192	61	Male	Secondary Education	Fashion Pattern Maker	4	5
193	61	Male	Higher Education	Professor	1	6
194	61	Male	Higher Education	Professor	2	7
195	62	Male	Higher Education	Lecturer	2	8
196	62	Female	Higher Education	Professor	1	9
197	62	Female	Secondary Education	Technical Assistant	2	10
198	63	Female	Secondary Education	Housekeeper	1	11
199	64	Male	Higher Education	Lecturer	2	12
200	64	Male	Higher Education	Lecturer	2	13
201	65	Male	Higher Education	Professor	3	14
202	66	Female	Higher Education	Professor	3	15
203	66	Female	Higher Education	Professor	2	16
204	66	Male	Higher Education	TV Operator	4	17
205	66	Female	Higher Education	?	5	18
206	67	Male	Higher Education	Professor	3	19
207	67	Female	Higher Education	Economist	2	20
208	68	Male	Higher Education	Medical Doctor	3	21
209	68	Male	Higher Education	Professor	1	22
210	69	Male	Higher Education	Medical Doctor	3	23
211	70	Male	Higher Education	Professor	2	24
212	70	Male	Higher Education	Architect	1	25
213	72	Male	Higher Education	Lecturer	2	26
214	74	Male	Higher Education	Sculptor	2	27
215	74	Male	Higher Education	Veterinarian	1	28
216	74	Male	Higher Education	Lecturer	1	29
217	90	Undefined	Secondary Education	Public servant	3	30
218					459
			Poverty		Sum						Percentages
					1	2	3	4	5	total						total
		30	Baby Boomers (1945-1960)	more than 60	8	12	6	3	1	30	26.6667	40	20	10	3.33333	100
		105	Generation X (1960-1980)	44 to 60	35	47	15	4	3	104	33.6538	45.1923	14.4231	3.84615	2.88462	100
		35	Millennials (Y) (1980-1995)	29 to 43	9	17	4	5	0	35	25.7143	48.5714	11.4286	14.2857	0	100
		48	Generation Z (1995-2010)	13 to 28	11	21	10	4	2	48	22.9167	43.75	20.8333	8.33333	4.16667	100
		218
Average	2.1055
SD	0.99211

## Sheet: Climate Change
	Question 1	Question 2	Question 3	Question 4	Question 12
1	17	Female	Secondary Education	———-	2	1
2	18	Female	Secondary Education	Student	3	2
3	18	Male	Higher Education	Student	4	3
4	18	Female	Higher Education	Student	1	4
5	18	Female	Secondary Education	Student	1	5
6	18	Female	Secondary Education	Student	1	6
7	19	Female	Higher Education	Student	2	7
8	19	Female	Secondary Education	Student	2	8
9	19	Female	Secondary Education	Student	3	9
10	19	Female	Secondary Education	Student	4	10
11	19	Female	Secondary Education	Student	1	11
12	20	Female	Secondary Education	Student	5	12
13	20	Female	Secondary Education	Student	3	13
14	20	Female	Primary and Lower Secondary Education	Student	1	14
15	20	Female	Secondary Education	Student	2	15
16	20	Male	Higher Education	Unemployed	4	16
17	20	Female	Higher Education	Student	1	17
18	20	Male	Secondary Education	Student	2	18
19	21	Female	Higher Education	Student	1	19
20	21	Female	Higher Education	Student	2	20
21	21	Female	Secondary Education	Student	3	21
22	21	Female	Higher Education	Student	3	22
23	21	Female	Higher Education	Student	2	23
24	21	Male	Secondary Education	Depositor	1	24
25	21	Female	Secondary Education	Student	3	25
26	22	Male	Secondary Education	Student	2	26
27	22	Female	Higher Education	Student	3	27
28	22	Male	Higher Education	Communication Designer	4	28
29	22	Female	Higher Education	Student	2	29
30	22	Female	Higher Education	Pastry Chef	2	30
31	22	Male	Higher Education	Student	2	31
32	22	Male	Higher Education	Food & Beverage	1	32
33	22	Male	Higher Education	Waiter	2	33
34	22	Female	Higher Education	Event Organizer	2	34
35	23	Female	Higher Education	Designer	2	35
36	23	Female	Higher Education	Communication Designer	2	36
37	23	Female	Higher Education	Bakery / Pastry	2	37
38	23	Female	Higher Education	Designer	4	38
39	23	Female	Higher Education	Student	1	39
40	23	Male	Higher Education	Student	2	40
41	23	Female	Higher Education	Student	2	41
42	23	Female	Higher Education	Student	1	42
43	24	Female	Secondary Education	Student	2	43
44	24	Female	Higher Education	Unemployed	2	44
45	25	Male	Higher Education	Medical Doctor	4	45
46	26	Female	Higher Education	Architect	2	46
47	28	Female	Higher Education	Secretariat.	1	47
48	28	Female	Higher Education	Researcher	3	48
49	29	Male	Higher Education	Chef de cuisine	2	1
50	29	Female	Higher Education	Communication Manager	3	2
51	29	Female	Higher Education	Musician	2	3
52	30	Male	Higher Education	Professor	1	4
53	30	Female	Primary and Lower Secondary Education	Designer	2	5
54	31	Female	Higher Education	Higher technical staff	3	6
55	31	Female	Higher Education	Interior Designer	2	7
56	32	Male	Higher Education	Professor	4	8
57	33	Female	Higher Education	Designer	1	9
58	33	Male	Higher Education	Strategist and Creative Director.	2	10
59	34	Male	Higher Education	Librarian	2	11
60	35	Female	Higher Education	Lecturer	2	12
61	35	Female	Higher Education	Researcher	2	13
62	36	Female	Higher Education	Graphic Designer	4	14
63	36	Female	Higher Education	Even Manager	1	15
64	36	Male	Higher Education	Engineer	2	16
65	36	Female	Higher Education	Graphic Designer	1	17
66	36	Male	Higher Education	Design Manager	1	18
67	38	Male	Higher Education	Engineer	2	19
68	38	Female	Higher Education	Nutritionist	3	20
69	39	Female	Secondary Education	Cashier	1	21
70	39	Female	Higher Education	Lecturer	1	22
71	40	Female	Higher Education	Marketing & Communication	1	23
72	40	Female	Higher Education	Professor	1	24
73	41	Male	Higher Education	Medical Doctor	2	25
74	41	Female	Higher Education	Illustrator	2	26
75	41	Male	Higher Education	Statistician	2	27
76	42	Female	Higher Education	Professor	2	28
77	42	Female	Higher Education	Cultural Management	2	29
78	42	Male	Higher Education	Manager	4	30
79	42	Male	Higher Education	Lecturer	2	31
80	42	Male	Secondary Education	Gas Network Installer	4	32
81	43	Male	Higher Education	Professor	3	33
82	43	Male	Higher Education	Professor	1	34
83	43	Male	Higher Education	Sommelier	2	35
84	44	Female	Higher Education	Administrative	3	1
85	44	Female	Higher Education	Professor	2	2
86	44	Female	Higher Education	Civil Engineer	1	3
87	44	Female	Higher Education	Professor	2	4
88	44	Male	Secondary Education	Chef de cuisine	3	5
89	45	Male	Higher Education	Commercial	3	6
90	45	Male	Higher Education	Lecturer	2	7
91	45	Female	Higher Education	Instructor	3	8
92	46	Female	Higher Education	Professor	1	9
93	46	Female	Higher Education	Public Relations and Communications Coordinator.	3	10
94	46	Female	Higher Education	Professor	1	11
95	46	Female	Higher Education	Local Accommodation Manager	2	12
96	47	Male	Higher Education	Engineer	3	13
97	47	Male	Higher Education	Professor	2	14
98	47	Male	Higher Education	Business Administrator.	5	15
99	47	Female	Higher Education	Food Engineer	1	16
100	47	Male	Higher Education	Lecturer	2	17
101	48	Male	Higher Education	Engineer	2	18
102	48	Female	Higher Education	Professor	2	19
103	48	Female	Higher Education	Researcher	1	20
104	48	Female	Higher Education	Professor	3	21
105	48	Female	Higher Education	Veterinarian	1	22
106	48	Female	Higher Education	Professor	1	23
107	48	Female	Higher Education	Early Childhood Educator.	3	24
108	48	Male	Higher Education	Lecturer	3	25
109	48	Female	Higher Education	Lecturer	1	26
110	48	Female	Higher Education	Lecturer	1	27
111	49	Female	Higher Education	Lecturer	2	28
112	49	Male	Higher Education	Professor	2	29
113	49	Male	Secondary Education	Accounting Technician	3	30
114	49	Female	Higher Education	Professor	1	31
115	49	Female	Higher Education	Accountant	1	32
116	49	Male	Higher Education	Chef du cuisine	3	33
117	49	Female	Higher Education	Journalist	2	34
118	49	Male	Higher Education	Cook	1	35
119	49	Male	Higher Education	Manager	4	36
120	50	Female	Higher Education	Advertising Specialist	5	37
121	50	Female	Higher Education	Senior Communications Officer	1	38
122	50	Female	Higher Education	Professor	2	39
123	50	Female	Higher Education	Professor	1	40
124	50	Female	Secondary Education	Technical Assistant	1	41
125	50	Female	Higher Education	Psychologist	2	42
126	50	Female	Higher Education	Economist	1	43
127	51	Male	Higher Education	Designer	1	44
128	51	Male	Higher Education	Professor	2	45
129	51	Female	Higher Education	Professor	2	46
130	51	Female	Higher Education	Professor	2	47
131	52	Female	Higher Education	Social Assistant	1	48
132	52	Male	Higher Education	Lecturer	2	49
133	52	Male	Higher Education	Designer	2	50
134	52	Female	Higher Education	Psychologist	3	51
135	52	Male	Higher Education	Industrial Designer	3	52
136	52	Female	Higher Education	Professor	1	53
137	52	Male	Higher Education	Architect	4	54
138	52	Male	Higher Education	Professor	2	55
139	53	Female	Higher Education	Treasury Coordination	4	56
140	53	Female	Secondary Education	Administrative	2	57
141	53	Male	Higher Education	Lecturer	1	58
142	53	Female	Higher Education	Lawyer	2	59
143	53	Female	Higher Education	Treasury Coordination	2	60
144	53	Female	Higher Education	Lecturer	2	61
145	53	Female	Higher Education	Psychologist	3	62
146	53	Female	Higher Education	Professor	1	63
147	53	Male	Higher Education	Designer	2	64
148	53	Female	Secondary Education	Administrative Assistant	3	65
149	53	Female	Higher Education	Professor	1	66
150	53	Male	Higher Education	Hotel Director	1	67
151	54	Female	Higher Education	Bank employee	1	68
152	54	Male	Higher Education	Architect	5	69
153	54	Male	Secondary Education	Commercial	1	70
154	55	Female	Higher Education	Administrative Coordinator	1	71
155	55	Female	Higher Education	Administrative Coordinator	1	72
156	55	Male	Secondary Education	Bank employee	2	73
157	55	Female	Secondary Education	Clerk	3	74
158	55	Female	Primary and Lower Secondary Education	Administrative	2	75
159	55	Male	Higher Education	Professor	2	76
160	55	Male	Higher Education	Translator	2	77
161	56	Male	Higher Education	Professor	1	78
162	56	Male	Higher Education	Professor	3	79
163	56	Female	Higher Education	Librarian	2	80
164	57	Female	Secondary Education	Commercial Assistant	1	81
165	57	Female	Higher Education	Lecturer	2	82
166	57	Female	Higher Education	Early Childhood Educator	3	83
167	57	Male	Higher Education	Professor	2	84
168	57	Male	Higher Education	Professor	2	85
169	57	Female	Higher Education	Professor	2	86
170	58	Male	Higher Education	Lecturer	1	87
171	58	Male	Higher Education	Designer	2	88
172	58	Male	Higher Education	CEO	4	89
173	58	Male	Higher Education	Professor	2	90
174	59	Male	Higher Education	Professor	3	91
175	59	Female	Higher Education	Professor	1	92
176	59	Male	Higher Education	Professor	4	93
177	59	Female	Higher Education	Financial Advisor	4	94
178	59	Male	Higher Education	Architect	2	95
179	59	Female	Higher Education	Professor	1	96
180	59	Male	Higher Education	Civil Engineer	1	97
181	59	Male	Higher Education	Professor	1	98
182	59	Male	Higher Education	Administrator	1	99
182	60	Male	Higher Education	Businessman	3	100
183	60	Female	Secondary Education	Technical Assistant	2	101
184	60	Male	Higher Education	Architect	2	102
185	60	Male	Higher Education	Professor	2	103
186	60	Male	Higher Education	Designer	1	104
187	60	Female	Higher Education	Higher Technician	2	105
188	61	Male	Higher Education	Director	3	1
189	61	Male	Higher Education	Professor	2	2
190	61	Male	Higher Education	Lecturer	5	3
191	61	Male	Higher Education	Manager	1	4
192	61	Male	Secondary Education	Fashion Pattern Maker	3	5
193	61	Male	Higher Education	Professor	1	6
194	61	Male	Higher Education	Professor	2	7
195	62	Male	Higher Education	Lecturer	2	8
196	62	Female	Higher Education	Professor	1	9
197	62	Female	Secondary Education	Technical Assistant	3	10
198	63	Female	Secondary Education	Housekeeper	1	11
199	64	Male	Higher Education	Lecturer	2	12
200	64	Male	Higher Education	Lecturer	2	13
201	65	Male	Higher Education	Professor	3	14
202	66	Female	Higher Education	Professor	2	15
203	66	Female	Higher Education	Professor	1	16
204	66	Male	Higher Education	TV Operator	3	17
205	66	Female	Higher Education	?	5	18
206	67	Male	Higher Education	Professor	3	19
207	67	Female	Higher Education	Economist	4	20
208	68	Male	Higher Education	Medical Doctor	4	21
209	68	Male	Higher Education	Professor	1	22
210	69	Male	Higher Education	Medical Doctor	3	23
211	70	Male	Higher Education	Professor	2	24
212	70	Male	Higher Education	Architect	1	25
213	72	Male	Higher Education	Lecturer	3	26
214	74	Male	Higher Education	Sculptor	2	27
215	74	Male	Higher Education	Veterinarian	1	28
216	74	Male	Higher Education	Lecturer	2	29
217	90	Undefined	Secondary Education	Public servant	3	30
218					465
			Climate Change		Sum						Percentages
					1	2	3	4	5	total						total
		30	Baby Boomers (1945-1960)	more than 60	8	9	9	2	2	30	26.6667	30	30	6.66667	6.66667	100
		105	Generation X (1960-1980)	44 to 60	36	40	20	5	3	104	34.6154	38.4615	19.2308	4.80769	2.88462	100
		35	Millennials (Y) (1980-1995)	29 to 43	10	17	4	4	0	35	28.5714	48.5714	11.4286	11.4286	0	100
		48	Generation Z (1995-2010)	13 to 28	12	21	8	6	1	48	25	43.75	16.6667	12.5	2.08333	100
		218
Average	2.13303
SD	1.02524

## Sheet: Obesity
	Question 1	Question 2	Question 3	Question 4	Question 13
1	17	Female	Secondary Education	———-	2
2	18	Female	Secondary Education	Student	4
3	18	Male	Higher Education	Student	4
4	18	Female	Higher Education	Student	5
5	18	Female	Secondary Education	Student	3
6	18	Female	Secondary Education	Student	4
7	19	Female	Higher Education	Student	1
8	19	Female	Secondary Education	Student	3
9	19	Female	Secondary Education	Student	4
10	19	Female	Secondary Education	Student	2
11	19	Female	Secondary Education	Student	1
12	20	Female	Secondary Education	Student	2
13	20	Female	Secondary Education	Student	3
14	20	Female	Primary and Lower Secondary Education	Student	3
15	20	Female	Secondary Education	Student	5
16	20	Male	Higher Education	Unemployed	4
17	20	Female	Higher Education	Student	1
18	20	Male	Secondary Education	Student	2
19	21	Female	Higher Education	Student	1
20	21	Female	Higher Education	Student	2
21	21	Female	Secondary Education	Student	4
22	21	Female	Higher Education	Student	3
23	21	Female	Higher Education	Student	3
24	21	Male	Secondary Education	Depositor	1
25	21	Female	Secondary Education	Student	3
26	22	Male	Secondary Education	Student	2
27	22	Female	Higher Education	Student	4
28	22	Male	Higher Education	Communication Designer	1
29	22	Female	Higher Education	Student	3
30	22	Female	Higher Education	Pastry Chef	3
31	22	Male	Higher Education	Student	2
32	22	Male	Higher Education	Food & Beverage	3
33	22	Male	Higher Education	Waiter	2
34	22	Female	Higher Education	Event Organizer	3
35	23	Female	Higher Education	Designer	2
36	23	Female	Higher Education	Communication Designer	4
37	23	Female	Higher Education	Bakery / Pastry	4
38	23	Female	Higher Education	Designer	4
39	23	Female	Higher Education	Student	1
40	23	Male	Higher Education	Student	3
41	23	Female	Higher Education	Student	2
42	23	Female	Higher Education	Student	1
43	24	Female	Secondary Education	Student	1
44	24	Female	Higher Education	Unemployed	3
45	25	Male	Higher Education	Medical Doctor	3
46	26	Female	Higher Education	Architect	3
47	28	Female	Higher Education	Secretariat.	3
48	28	Female	Higher Education	Researcher	2
49	29	Male	Higher Education	Chef de cuisine	2
50	29	Female	Higher Education	Communication Manager	5
51	29	Female	Higher Education	Musician	3
52	30	Male	Higher Education	Professor	1
53	30	Female	Primary and Lower Secondary Education	Designer	1
54	31	Female	Higher Education	Higher technical staff	3
55	31	Female	Higher Education	Interior Designer	2
56	32	Male	Higher Education	Professor	1
57	33	Female	Higher Education	Designer	4
58	33	Male	Higher Education	Strategist and Creative Director.	2
59	34	Male	Higher Education	Librarian	3
60	35	Female	Higher Education	Lecturer	4
61	35	Female	Higher Education	Researcher	5
62	36	Female	Higher Education	Graphic Designer	3
63	36	Female	Higher Education	Even Manager	4
64	36	Male	Higher Education	Engineer	3
65	36	Female	Higher Education	Graphic Designer	2
66	36	Male	Higher Education	Design Manager	3
67	38	Male	Higher Education	Engineer	3
68	38	Female	Higher Education	Nutritionist	1
69	39	Female	Secondary Education	Cashier	1
70	39	Female	Higher Education	Lecturer	2
71	40	Female	Higher Education	Marketing & Communication	1
72	40	Female	Higher Education	Professor	4
73	41	Male	Higher Education	Medical Doctor	2
74	41	Female	Higher Education	Illustrator	3
75	41	Male	Higher Education	Statistician	2
76	42	Female	Higher Education	Professor	3
77	42	Female	Higher Education	Cultural Management	3
78	42	Male	Higher Education	Manager	3
79	42	Male	Higher Education	Lecturer	2
80	42	Male	Secondary Education	Gas Network Installer	5
81	43	Male	Higher Education	Professor	3
82	43	Male	Higher Education	Professor	2
83	43	Male	Higher Education	Sommelier	2
84	44	Female	Higher Education	Administrative	3
85	44	Female	Higher Education	Professor	3
86	44	Female	Higher Education	Civil Engineer	3
87	44	Female	Higher Education	Professor	4
88	44	Male	Secondary Education	Chef de cuisine	2
89	45	Male	Higher Education	Commercial	2
90	45	Male	Higher Education	Lecturer	3
91	45	Female	Higher Education	Instructor	4
92	46	Female	Higher Education	Professor	3
93	46	Female	Higher Education	Public Relations and Communications Coordinator.	3
94	46	Female	Higher Education	Professor	2
95	46	Female	Higher Education	Local Accommodation Manager	3
96	47	Male	Higher Education	Engineer	4
97	47	Male	Higher Education	Professor	1
98	47	Male	Higher Education	Business Administrator.	2
99	47	Female	Higher Education	Food Engineer	1
100	47	Male	Higher Education	Lecturer	1
101	48	Male	Higher Education	Engineer	5
102	48	Female	Higher Education	Professor	3
103	48	Female	Higher Education	Researcher	1
104	48	Female	Higher Education	Professor	4
105	48	Female	Higher Education	Veterinarian	2
106	48	Female	Higher Education	Professor	4
107	48	Female	Higher Education	Early Childhood Educator.	1
108	48	Male	Higher Education	Lecturer	5
109	48	Female	Higher Education	Lecturer	2
110	48	Female	Higher Education	Lecturer	4
111	49	Female	Higher Education	Lecturer	4
112	49	Male	Higher Education	Professor	3
113	49	Male	Secondary Education	Accounting Technician	1
114	49	Female	Higher Education	Professor	3
115	49	Female	Higher Education	Accountant	1
116	49	Male	Higher Education	Chef du cuisine	3
117	49	Female	Higher Education	Journalist	3
118	49	Male	Higher Education	Cook	2
119	49	Male	Higher Education	Manager	2
120	50	Female	Higher Education	Advertising Specialist	3
121	50	Female	Higher Education	Senior Communications Officer	1
122	50	Female	Higher Education	Professor	4
123	50	Female	Higher Education	Professor	1
124	50	Female	Secondary Education	Technical Assistant	2
125	50	Female	Higher Education	Psychologist	4
126	50	Female	Higher Education	Economist	2
127	51	Male	Higher Education	Designer	3
128	51	Male	Higher Education	Professor	1
129	51	Female	Higher Education	Professor	2
130	51	Female	Higher Education	Professor	3
131	52	Female	Higher Education	Social Assistant	2
132	52	Male	Higher Education	Lecturer	3
133	52	Male	Higher Education	Designer	4
134	52	Female	Higher Education	Psychologist	4
135	52	Male	Higher Education	Industrial Designer	4
136	52	Female	Higher Education	Professor	1
137	52	Male	Higher Education	Architect	1
138	52	Male	Higher Education	Professor	3
139	53	Female	Higher Education	Treasury Coordination	2
140	53	Female	Secondary Education	Administrative	2
141	53	Male	Higher Education	Lecturer	3
142	53	Female	Higher Education	Lawyer	3
143	53	Female	Higher Education	Treasury Coordination	1
144	53	Female	Higher Education	Lecturer	3
145	53	Female	Higher Education	Psychologist	3
146	53	Female	Higher Education	Professor	5
147	53	Male	Higher Education	Designer	1
148	53	Female	Secondary Education	Administrative Assistant	1
149	53	Female	Higher Education	Professor	2
150	53	Male	Higher Education	Hotel Director	2
151	54	Female	Higher Education	Bank employee	4
152	54	Male	Higher Education	Architect	3
153	54	Male	Secondary Education	Commercial	4
154	55	Female	Higher Education	Administrative Coordinator	1
155	55	Female	Higher Education	Administrative Coordinator	2
156	55	Male	Secondary Education	Bank employee	4
157	55	Female	Secondary Education	Clerk	4
158	55	Female	Primary and Lower Secondary Education	Administrative	2
159	55	Male	Higher Education	Professor	3
160	55	Male	Higher Education	Translator	2
161	56	Male	Higher Education	Professor	4
162	56	Male	Higher Education	Professor	3
163	56	Female	Higher Education	Librarian	4
164	57	Female	Secondary Education	Commercial Assistant	3
165	57	Female	Higher Education	Lecturer	5
166	57	Female	Higher Education	Early Childhood Educator	4
167	57	Male	Higher Education	Professor	1
168	57	Male	Higher Education	Professor	3
169	57	Female	Higher Education	Professor	1
170	58	Male	Higher Education	Lecturer	1
171	58	Male	Higher Education	Designer	4
172	58	Male	Higher Education	CEO	1
173	58	Male	Higher Education	Professor	3
174	59	Male	Higher Education	Professor	4
175	59	Female	Higher Education	Professor	2
176	59	Male	Higher Education	Professor	4
177	59	Female	Higher Education	Financial Advisor	3
178	59	Male	Higher Education	Architect	3
179	59	Female	Higher Education	Professor	1
180	59	Male	Higher Education	Civil Engineer	3
181	59	Male	Higher Education	Professor	4
182	59	Male	Higher Education	Administrator	2
182	60	Male	Higher Education	Businessman	2
183	60	Female	Secondary Education	Technical Assistant	3
184	60	Male	Higher Education	Architect	3
185	60	Male	Higher Education	Professor	2
186	60	Male	Higher Education	Designer	2
187	60	Female	Higher Education	Higher Technician	4
188	61	Male	Higher Education	Director	3
189	61	Male	Higher Education	Professor	3
190	61	Male	Higher Education	Lecturer	2
191	61	Male	Higher Education	Manager	1
192	61	Male	Secondary Education	Fashion Pattern Maker	3
193	61	Male	Higher Education	Professor	2
194	61	Male	Higher Education	Professor	2
195	62	Male	Higher Education	Lecturer	4
196	62	Female	Higher Education	Professor	3
197	62	Female	Secondary Education	Technical Assistant	3
198	63	Female	Secondary Education	Housekeeper	3
199	64	Male	Higher Education	Lecturer	1
200	64	Male	Higher Education	Lecturer	2
201	65	Male	Higher Education	Professor	1
202	66	Female	Higher Education	Professor	3
203	66	Female	Higher Education	Professor	2
204	66	Male	Higher Education	TV Operator	2
205	66	Female	Higher Education	?	4
206	67	Male	Higher Education	Professor	5
207	67	Female	Higher Education	Economist	4
208	68	Male	Higher Education	Medical Doctor	4
209	68	Male	Higher Education	Professor	2
210	69	Male	Higher Education	Medical Doctor	4
211	70	Male	Higher Education	Professor	3
212	70	Male	Higher Education	Architect	4
213	72	Male	Higher Education	Lecturer	5
214	74	Male	Higher Education	Sculptor	2
215	74	Male	Higher Education	Veterinarian	1
216	74	Male	Higher Education	Lecturer	3
217	90	Undefined	Secondary Education	Public servant	3
218					587
			Obesity		Sum						Percentages
					1	2	3	4	5	total						total
		30	Baby Boomers (1945-1960)	more than 60	4	8	10	6	2	30	13.3333	26.6667	33.3333	20	6.66667	100
		105	Generation X (1960-1980)	44 to 60	21	24	31	24	4	104	20.1923	23.0769	29.8077	23.0769	3.84615	100
		35	Millennials (Y) (1980-1995)	29 to 43	6	10	12	4	3	35	17.1429	28.5714	34.2857	11.4286	8.57143	100
		48	Generation Z (1995-2010)	13 to 28	9	11	16	10	2	48	18.75	22.9167	33.3333	20.8333	4.16667	100
		218
Average	2.69585
SD	1.13577

## Sheet: Violence
	Question 1	Question 2	Question 3	Question 4	Question 14
1	17	Female	Secondary Education	———-	3	1
2	18	Female	Secondary Education	Student	2	2
3	18	Male	Higher Education	Student	4	3
4	18	Female	Higher Education	Student	1	4
5	18	Female	Secondary Education	Student	3	5
6	18	Female	Secondary Education	Student	4	6
7	19	Female	Higher Education	Student	2	7
8	19	Female	Secondary Education	Student	3	8
9	19	Female	Secondary Education	Student	2	9
10	19	Female	Secondary Education	Student	2	10
11	19	Female	Secondary Education	Student	2	11
12	20	Female	Secondary Education	Student	4	12
13	20	Female	Secondary Education	Student	3	13
14	20	Female	Primary and Lower Secondary Education	Student	2	14
15	20	Female	Secondary Education	Student	4	15
16	20	Male	Higher Education	Unemployed	5	16
17	20	Female	Higher Education	Student	1	17
18	20	Male	Secondary Education	Student	2	18
19	21	Female	Higher Education	Student	1	19
20	21	Female	Higher Education	Student	2	20
21	21	Female	Secondary Education	Student	4	21
22	21	Female	Higher Education	Student	2	22
23	21	Female	Higher Education	Student	4	23
24	21	Male	Secondary Education	Depositor	1	24
25	21	Female	Secondary Education	Student	4	25
26	22	Male	Secondary Education	Student	1	26
27	22	Female	Higher Education	Student	3	27
28	22	Male	Higher Education	Communication Designer	2	28
29	22	Female	Higher Education	Student	1	29
30	22	Female	Higher Education	Pastry Chef	3	30
31	22	Male	Higher Education	Student	3	31
32	22	Male	Higher Education	Food & Beverage	2	32
33	22	Male	Higher Education	Waiter	2	33
34	22	Female	Higher Education	Event Organizer	2	34
35	23	Female	Higher Education	Designer	2	35
36	23	Female	Higher Education	Communication Designer	2	36
37	23	Female	Higher Education	Bakery / Pastry	3	37
38	23	Female	Higher Education	Designer	1	38
39	23	Female	Higher Education	Student	3	39
40	23	Male	Higher Education	Student	1	40
41	23	Female	Higher Education	Student	1	41
42	23	Female	Higher Education	Student	1	42
43	24	Female	Secondary Education	Student	1	43
44	24	Female	Higher Education	Unemployed	1	44
45	25	Male	Higher Education	Medical Doctor	4	45
46	26	Female	Higher Education	Architect	3	46
47	28	Female	Higher Education	Secretariat.	1	47
48	28	Female	Higher Education	Researcher	2	48
49	29	Male	Higher Education	Chef de cuisine	4	1
50	29	Female	Higher Education	Communication Manager	3	2
51	29	Female	Higher Education	Musician	2	3
52	30	Male	Higher Education	Professor	2	4
53	30	Female	Primary and Lower Secondary Education	Designer	1	5
54	31	Female	Higher Education	Higher technical staff	1	6
55	31	Female	Higher Education	Interior Designer	2	7
56	32	Male	Higher Education	Professor	2	8
57	33	Female	Higher Education	Designer	1	9
58	33	Male	Higher Education	Strategist and Creative Director.	3	10
59	34	Male	Higher Education	Librarian	2	11
60	35	Female	Higher Education	Lecturer	2	12
61	35	Female	Higher Education	Researcher	3	13
62	36	Female	Higher Education	Graphic Designer	3	14
63	36	Female	Higher Education	Even Manager	3	15
64	36	Male	Higher Education	Engineer	3	16
65	36	Female	Higher Education	Graphic Designer	2	17
66	36	Male	Higher Education	Design Manager	2	18
67	38	Male	Higher Education	Engineer	2	19
68	38	Female	Higher Education	Nutritionist	2	20
69	39	Female	Secondary Education	Cashier	2	21
70	39	Female	Higher Education	Lecturer	1	22
71	40	Female	Higher Education	Marketing & Communication	1	23
72	40	Female	Higher Education	Professor	2	24
73	41	Male	Higher Education	Medical Doctor	1	25
74	41	Female	Higher Education	Illustrator	2	26
75	41	Male	Higher Education	Statistician	3	27
76	42	Female	Higher Education	Professor	1	28
77	42	Female	Higher Education	Cultural Management	2	29
78	42	Male	Higher Education	Manager	1	30
79	42	Male	Higher Education	Lecturer	2	31
80	42	Male	Secondary Education	Gas Network Installer	4	32
81	43	Male	Higher Education	Professor	3	33
82	43	Male	Higher Education	Professor	1	34
83	43	Male	Higher Education	Sommelier	2	35
84	44	Female	Higher Education	Administrative	1	1
85	44	Female	Higher Education	Professor	2	2
86	44	Female	Higher Education	Civil Engineer	3	3
87	44	Female	Higher Education	Professor	4	4
88	44	Male	Secondary Education	Chef de cuisine	1	5
89	45	Male	Higher Education	Commercial	2	6
90	45	Male	Higher Education	Lecturer	2	7
91	45	Female	Higher Education	Instructor	3	8
92	46	Female	Higher Education	Professor	2	9
93	46	Female	Higher Education	Public Relations and Communications Coordinator.	2	10
94	46	Female	Higher Education	Professor	1	11
95	46	Female	Higher Education	Local Accommodation Manager	4	12
96	47	Male	Higher Education	Engineer	2	13
97	47	Male	Higher Education	Professor	1	14
98	47	Male	Higher Education	Business Administrator.	2	15
99	47	Female	Higher Education	Food Engineer	3	16
100	47	Male	Higher Education	Lecturer	2	17
101	48	Male	Higher Education	Engineer	5	18
102	48	Female	Higher Education	Professor	2	19
103	48	Female	Higher Education	Researcher	1	20
104	48	Female	Higher Education	Professor	1	21
105	48	Female	Higher Education	Veterinarian	3	22
106	48	Female	Higher Education	Professor	1	23
107	48	Female	Higher Education	Early Childhood Educator.	1	24
108	48	Male	Higher Education	Lecturer	2	25
109	48	Female	Higher Education	Lecturer	2	26
110	48	Female	Higher Education	Lecturer	1	27
111	49	Female	Higher Education	Lecturer	2	28
112	49	Male	Higher Education	Professor	3	29
113	49	Male	Secondary Education	Accounting Technician	3	30
114	49	Female	Higher Education	Professor	2	31
115	49	Female	Higher Education	Accountant	1	32
116	49	Male	Higher Education	Chef du cuisine	2	33
117	49	Female	Higher Education	Journalist	1	34
118	49	Male	Higher Education	Cook	1	35
119	49	Male	Higher Education	Manager	3	36
120	50	Female	Higher Education	Advertising Specialist	3	37
121	50	Female	Higher Education	Senior Communications Officer	1	38
122	50	Female	Higher Education	Professor	4	39
123	50	Female	Higher Education	Professor	1	40
124	50	Female	Secondary Education	Technical Assistant	3	41
125	50	Female	Higher Education	Psychologist	2	42
126	50	Female	Higher Education	Economist	1	43
127	51	Male	Higher Education	Designer	1	44
128	51	Male	Higher Education	Professor	1	45
129	51	Female	Higher Education	Professor	3	46
130	51	Female	Higher Education	Professor	2	47
131	52	Female	Higher Education	Social Assistant	1	48
132	52	Male	Higher Education	Lecturer	2	49
133	52	Male	Higher Education	Designer	2	50
134	52	Female	Higher Education	Psychologist	2	51
135	52	Male	Higher Education	Industrial Designer	2	52
136	52	Female	Higher Education	Professor	1	53
137	52	Male	Higher Education	Architect	4	54
138	52	Male	Higher Education	Professor	3	55
139	53	Female	Higher Education	Treasury Coordination	4	56
140	53	Female	Secondary Education	Administrative	2	57
141	53	Male	Higher Education	Lecturer	1	58
142	53	Female	Higher Education	Lawyer	3	59
143	53	Female	Higher Education	Treasury Coordination	2	60
144	53	Female	Higher Education	Lecturer	2	61
145	53	Female	Higher Education	Psychologist	1	62
146	53	Female	Higher Education	Professor	3	63
147	53	Male	Higher Education	Designer	1	64
148	53	Female	Secondary Education	Administrative Assistant	1	65
149	53	Female	Higher Education	Professor	1	66
150	53	Male	Higher Education	Hotel Director	1	67
151	54	Female	Higher Education	Bank employee	1	68
152	54	Male	Higher Education	Architect	5	69
153	54	Male	Secondary Education	Commercial	2	70
154	55	Female	Higher Education	Administrative Coordinator	1	71
155	55	Female	Higher Education	Administrative Coordinator	1	72
156	55	Male	Secondary Education	Bank employee	3	73
157	55	Female	Secondary Education	Clerk	4	74
158	55	Female	Primary and Lower Secondary Education	Administrative	2	75
159	55	Male	Higher Education	Professor	2	76
160	55	Male	Higher Education	Translator	2	77
161	56	Male	Higher Education	Professor	3	78
162	56	Male	Higher Education	Professor	3	79
163	56	Female	Higher Education	Librarian	5	80
164	57	Female	Secondary Education	Commercial Assistant	2	81
165	57	Female	Higher Education	Lecturer	4	82
166	57	Female	Higher Education	Early Childhood Educator	4	83
167	57	Male	Higher Education	Professor	3	84
168	57	Male	Higher Education	Professor	2	85
169	57	Female	Higher Education	Professor	2	86
170	58	Male	Higher Education	Lecturer	1	87
171	58	Male	Higher Education	Designer	2	88
172	58	Male	Higher Education	CEO	4	89
173	58	Male	Higher Education	Professor	3	90
174	59	Male	Higher Education	Professor	4	91
175	59	Female	Higher Education	Professor	3	92
176	59	Male	Higher Education	Professor	4	93
177	59	Female	Higher Education	Financial Advisor	4	94
178	59	Male	Higher Education	Architect	3	95
179	59	Female	Higher Education	Professor	1	96
180	59	Male	Higher Education	Civil Engineer	1	97
181	59	Male	Higher Education	Professor	1	98
182	59	Male	Higher Education	Administrator	2	99
182	60	Male	Higher Education	Businessman	2	100
183	60	Female	Secondary Education	Technical Assistant	2	101
184	60	Male	Higher Education	Architect	1	102
185	60	Male	Higher Education	Professor	2	103
186	60	Male	Higher Education	Designer	2	104
187	60	Female	Higher Education	Higher Technician	3	105
188	61	Male	Higher Education	Director	2	1
189	61	Male	Higher Education	Professor	1	2
190	61	Male	Higher Education	Lecturer	4	3
191	61	Male	Higher Education	Manager	1	4
192	61	Male	Secondary Education	Fashion Pattern Maker	3	5
193	61	Male	Higher Education	Professor	3	6
194	61	Male	Higher Education	Professor	2	7
195	62	Male	Higher Education	Lecturer	3	8
196	62	Female	Higher Education	Professor	3	9
197	62	Female	Secondary Education	Technical Assistant	3	10
198	63	Female	Secondary Education	Housekeeper	3	11
199	64	Male	Higher Education	Lecturer	2	12
200	64	Male	Higher Education	Lecturer	2	13
201	65	Male	Higher Education	Professor	1	14
202	66	Female	Higher Education	Professor	3	15
203	66	Female	Higher Education	Professor	2	16
204	66	Male	Higher Education	TV Operator	3	17
205	66	Female	Higher Education	?	5	18
206	67	Male	Higher Education	Professor	2	19
207	67	Female	Higher Education	Economist	4	20
208	68	Male	Higher Education	Medical Doctor	2	21
209	68	Male	Higher Education	Professor	2	22
210	69	Male	Higher Education	Medical Doctor	3	23
211	70	Male	Higher Education	Professor	2	24
212	70	Male	Higher Education	Architect	2	25
213	72	Male	Higher Education	Lecturer	4	26
214	74	Male	Higher Education	Sculptor	2	27
215	74	Male	Higher Education	Veterinarian	1	28
216	74	Male	Higher Education	Lecturer	1	29
217	90	Undefined	Secondary Education	Public servant	3	30
218					490
			Violence		Sums						Percentages
					1	2	3	4	5	total						total
		30	Baby Boomers (1945-1960)	more than 60	5	11	10	3	1	30	16.6667	36.6667	33.3333	10	3.33333	100
		105	Generation X (1960-1980)	44 to 60	33	35	21	12	3	104	31.7308	33.6538	20.1923	11.5385	2.88462	100
		35	Millennials (Y) (1980-1995)	29 to 43	9	16	8	2	0	35	25.7143	45.7143	22.8571	5.71429	0	100
		48	Generation Z (1995-2010)	13 to 28	13	16	10	8	1	48	27.0833	33.3333	20.8333	16.6667	2.08333	100
		218
Average	2.24424
SD	1.05178

[truncated: 4 more sheets: Security, Pandemics, Table 4, Table 5]
